# 1 Weak Vestibular Response in Persistent Developmental 2 Stuttering: Implications for Own Voice Identification

---

3 *Max Gattie<sup>1\*</sup>, Elena Lieven<sup>2</sup>, Karolina Kluk<sup>1</sup>*

4 <sup>1</sup> Manchester Centre for Audiology & Deafness (ManCAD), University of Manchester, Oxford Road,  
5 Manchester, M13 9PL, UK

6 <sup>2</sup> LuCiD (the ESRC International Centre for Language and Communicative Development), University of  
7 Manchester, Oxford Road, Manchester, M13 9PL, UK

8 **\* Correspondence:**

9 Corresponding Author

10 max.gattie@manchester.ac.uk

11 *Keywords: Stuttering<sub>1</sub>, vestibular<sub>2</sub>, efference copy<sub>3</sub>, speech-motor control<sub>4</sub>, own*  
12 *voice identifications<sub>5</sub>, speech perception<sub>6</sub>, auditory scene analysis<sub>7</sub>, speech-induced*  
13 *suppression<sub>8</sub>.*

## 14 **Abstract**

15 Speech-motor and psycholinguistic models employ feedback control from an auditory stream  
16 corresponding to own voice. Such models underspecify how own voice is identified. It is  
17 proposed that own voice is identified through coincidence detection between the neural  
18 firing rates arising from deflection of cochlear and vestibular mechanoreceptors by the sound  
19 and vibration generated during vocalisation. The coincidence detection is proposed to differ  
20 in people who stutter. In an update to the approach-avoidance conflict model of Sheehan  
21 (1953, 1975) instances of stuttering are proposed to coincide with uncertainty over an  
22 ongoing speech act. Discussion covers speech-induced suppression, auditory scene analysis,  
23 and theories of mental content.

## 24 **1. Introduction**

25 Speech-motor and psycholinguistic models describe a feedforward system in which articulatory muscles  
26 receive coordinated nerve impulses with sufficient detail to generate speech sounds (e.g. Hickok &  
27 Poeppel, 2007; Levelt et al., 1999; Tourville & Guenther, 2011). Typically they employ feedback control as  
28 a check for error (Helmholtz, 1886; von Holst & Mittelstädt, 1950; Fairbanks, 1954). Predictive feedback  
29 control avoids instability due to timing delay by checking for sensory error against a forward model of the  
30 speech-motor plan (see review in Parrell & Houde, 2019). Errors checked for might include articulatory  
31 malfunction, or mismatch between spoken and intended message – the nature of the error checked for  
32 will vary, depending on the nature of the model.

33 Such models underspecify how an auditory stream corresponding to own voice is identified (i.e. an  
34 auditory stream defined as per Bregman, 1990). A typical requirement is that a mental representation of  
35 expected auditory consequences is referred to, or is already identical with, an auditory target map  
36 (O’Callaghan, 2015). The question arises of how such reference is managed in the opposite direction –  
37 how an auditory target map for own voice is created from ambient sound and vibration.

38

39 Greater understanding of own voice identification could improve speech-motor and psycholinguistic  
40 models. For example, previously overlooked activity in the auditory brainstem and periphery may explain  
41 otherwise intractable difficulties in understanding the cerebral and cerebellar activity accompanying  
42 speech and language. Such an approach is taken in the current article. A hypothesis is formulated for own  
43 voice identification. The hypothesis is then developed to provide an account of stuttering, a DSM-V  
44 diagnosis characterised by involuntary prolongations and repetitions during speech.

45 The article will proceed as follows. Section 2 will describe the hypothesis of own voice identification.  
46 Section 3 will build on the hypothesis of section 2 to present a novel account of stuttering, REMATCH  
47 (Reflexivity and Communicative Mismatch). Section 4 will provide discussion of themes arising from  
48 sections 2 and 3. In this way, the article will extend from a biophysical account of own voice  
49 identification, to a psychosocial account of interpersonal communication. It will progress from audiology,  
50 to speech-motor theory, to psycholinguistics and social psychology.

51 Hypothesis formulation follows inference to the best explanation (Lipton, 2004). Best explanation  
52 arguments are mutually supportive. In other words, if one has a best explanation argument of T, and one  
53 has a best explanation argument of D, it follows that one has a best explanation argument of (T + D). This  
54 pertains even if D is partially reliant on T. This system (sometimes referred to as abduction) differs from,  
55 for example, multiplicative combination of probabilities in which the combined probability is lower than  
56 either of its constituents. Refuting a best explanation argument requires presentation of a better  
57 explanation. The discussion in section 4 will summarise the scope of the best explanation argument. To  
58 aid that discussion, hypotheses will be presented following the Methodology of Scientific Research  
59 Programmes described by Lakatos (1970). This refers to a “hard core” of (generally unfalsifiable)  
60 hypotheses, along with a “protective belt” of testable auxiliary hypotheses. Distinction will also be made  
61 between the two kinds of causal explanation described by Botterill (2010). Process explanations are of  
62 how something happens, whereas contrastive explanations are of why something happens. These two  
63 kinds of explanation interact as understanding of causation is acquired and enhanced.

## 64 **2. Hypothesis of Own Voice Identification**

### 65 **2.1 Explanatory target**

66 Own voice identification is a specific instance of the cocktail party problem (Bee & Micheyl, 2008), an  
67 outstanding issue in auditory scene analysis in which there is no principled basis for discrimination in a  
68 multi-talker scenario. It is an example of an ill-posed problem (Hadamard 1902, 1923; Poggio & Koch,  
69 1985), sometimes referred to as an inverse problem, in which there is no mathematically unique  
70 solution.

### 71 **2.2 Candidate explanations**

72 There is no prior research offering a basis by which an own voice auditory stream is specifically  
73 distinguished from ambient sound and vibration (Shamma & Micheyl, 2010; Remez & Thomas, 2013;  
74 Bronkhorst, 2015). The most closely related literature emphasises the importance of body conducted  
75 vibration during own speech (von Békésy, 1949; Maurer & Landis, 1990; Pörschmann, 2000; Sohmer &  
76 Freeman, 2001; Shuster & Durrant, 2003; Reinfeldt et al., 2010; Meekings et al., 2015) or else describes

77 self talk and private speech through a Vygotskian developmental perspective (e.g. Fernyhough & Russell,  
78 1997; Atencio & Montero, 2009; Lupyan & Swingley, 2012).

79 There is also a large body of work about the role of own voice in speech monitoring systems (e.g. Postma,  
80 2000; Buschbaum, 2001; Ozdemir et al., 2007; Huettig & Hartsuiker, 2010; Nozari et al., 2011; Lind et al.,  
81 2014; Acheson & Hagoort, 2014; Kröger et al., 2016) or sensory-motor integration (e.g. Jürgens, 2002;  
82 Kaplan et al., 2008; Rosa et al., 2008; Zheng et al., 2010; Hickok et al., 2011; Behroozmand et al., 2015;  
83 Houde et al., 2015). This literature takes as a starting point that own voice has already been identified as  
84 an ascending auditory stream. It therefore does not address the current explanatory target. Literature  
85 concerning sensory-motor integration, and in particular the hypothesis of speech-induced suppression,  
86 will be discussed in section 2.4.1.

## 87 **2.3 A Novel Hypothesis of Own Voice Identification**

### 88 **2.3.1 Introduction**

89 The nature of the speech auditory brainstem response (BinKhamis et al., 2019) suggests that neural  
90 activity corresponding to identification of own voice could occur in the auditory brainstem. The auditory  
91 brainstem is innervated through the VIII cranial nerve, from bipolar ganglion cells which interface with  
92 mechanoreceptors of the inner ear. Neural activity corresponding to own voice could occur at the  
93 earliest within the bipolar ganglion cells of the ear itself.

94 Inner ear structure is common across mammals, consisting of an osseous labyrinth lined with sensory  
95 epithelium, and with several chambers. One of the chambers is the cochlea, a coiled structure containing  
96 mechanoreceptors which are deflected by ambient sound frequencies ranging from 20 Hz – 20,000 Hz in  
97 humans (Manley & Gummer, 2017). Other chambers comprise the vestibular system. These chambers  
98 include semicircular canals, in which mechanoreceptors are deflected by changes in angular velocity.  
99 There are also gravito-inertial otoliths, arranged such that mechanoreceptors are deflected by changes in  
100 linear velocity, and with resting state deflection corresponding to head orientation (Goldberg, 2012).

101 The traditional discrimination just described, of cochlear and vestibular chambers into hearing and  
102 equilibrational functions, is misleading (Tait, 1932). As for other vertebrates, mammalian otolithic receptors  
103 are deflected by vibration as well as by changes in body velocity or orientation relative to a fixed  
104 gravitational field. The vestibular system in mammals responds to vibrational frequencies up to 1,000 Hz,  
105 and may phase lock to higher frequencies (Curthoys et al., 2019).

106 Vestibular sensitivity is considerably greater to vibrations conducted through the body (BC) than to sound  
107 waves in air (AC). Electrophysiological studies show that when human responses of vestibular origin are  
108 referenced to a 60 dBA sound level typical of conversational speech, AC thresholds are 10 dB above  
109 baseline and BC thresholds 25 dB below baseline (McNerney & Burkard, 2011; Welgampola, Rosengren,  
110 Halmagyi & Colebatch, 2003). The act of speaking will deflect vestibular mechanoreceptors in humans  
111 (Todd, Rosegren & Colebatch, 2008; Curthoys, 2017; Curthoys et al., 2019).

### 112 **2.3.2 Concurrency Hypothesis**

113 The core hypothesis is that own voice is identified as an auditory stream through coincidence detection  
114 between vestibular and cochlear afferents. This will henceforth be referred to as the Concurrency  
115 Hypothesis.

116 The Concurrency Hypothesis describes a biologically grounded mechanism. The biological grounding is  
117 that there are two sets of mechanoreceptors for own voice. Figure 1 gives an overview of relevant  
118 details. Sound and vibrational energy deflecting stereocilia in cochlear hair cells corresponds to own voice

119 mixed with ambient environmental sounds. Concurrently, vibrational energy deflecting stereocilia in  
120 vestibular hair cells corresponds to own voice in isolation. Comparison of nerve impulses arising from  
121 cochlear and vestibular mechanoreceptors therefore provides a principled distinction between self and  
122 environment.

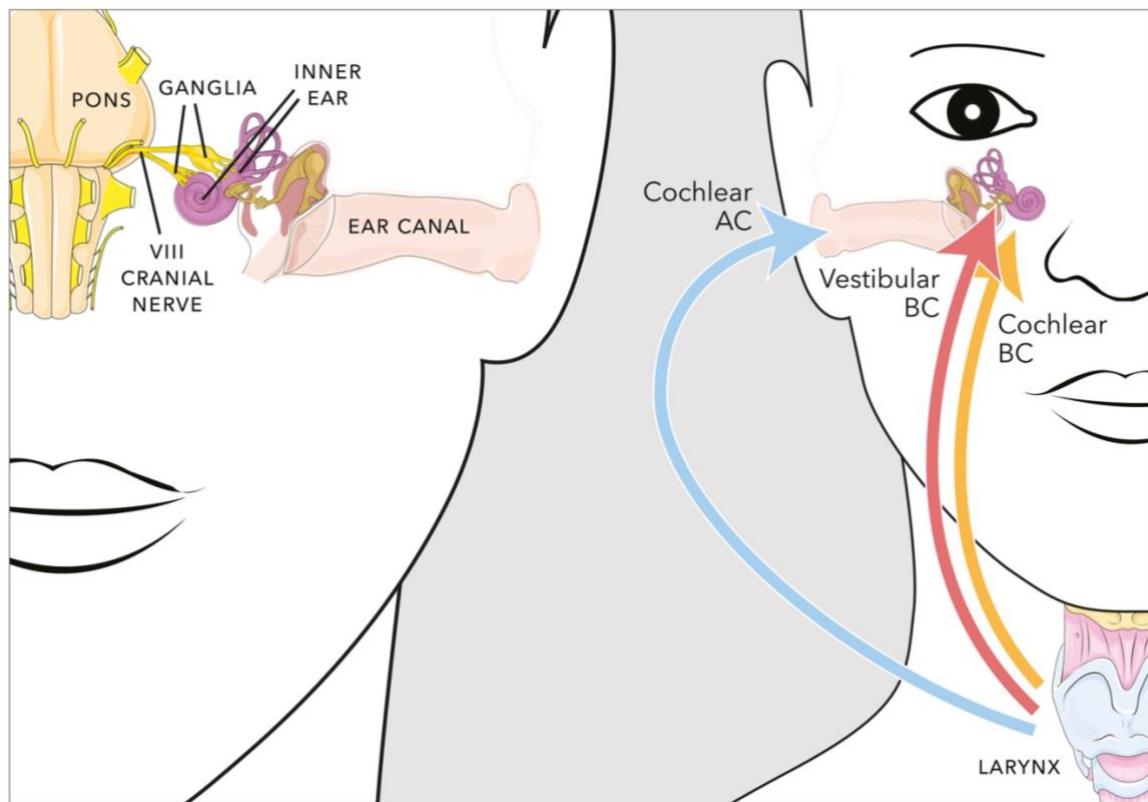

123

124 **Figure 1: Parameters affecting sound and vibration detection in the human ear. In vivo measurements**  
125 **are difficult, and estimates here are derived from primary sources where possible. For general**  
126 **background on sound source perception, see Yost et al. (2008); for hair cells see Eatock et al. (2006);**  
127 **for voice production see Titze (1994); and for propagation of sound and vibration see Fahy &**  
128 **Thompson (2015).**

129

130 **Left hand side: Anatomical parameters. Dendrons of bipolar ganglion cells terminate on sensory**  
131 **epithelial hair cells in the inner ear. Axons from the ganglia project or branch through the VIII cranial**  
132 **nerve to nuclei of the pons and medulla, and (for some axons from vestibular ganglia) the cerebellum.**  
133 **Sensory hair cells fire continuously, with changes in firing rate following deflections due to sound,**  
134 **vibration and movement. Changes in firing rate will in turn modify long-term potentiation of brainstem**  
135 **and cerebellar nerve cells.**

136

137 **Right hand side: Acoustic and vibrational parameters. During vocalisation, sound and vibration energy**  
138 **originates predominantly at the larynx (and occasionally higher in the vocal tract; Titze, 1994). Energy**  
139 **propagates via two routes to each ear: air conduction (AC) through air surrounding the head, or body**  
140 **conduction (BC) through the neck and head. The inner ear includes cochlear and vestibular sensory hair**  
141 **cells. Sounds are perceived when AC and BC stimulation above hearing threshold (by definition zero dB**  
142 **HL or higher) deflects stereocilia in cochlear hair cells, opening mechanically gated ion channels which**  
143 **set off a chain of activity culminating in release of neurotransmitters, which in turn will raise potentials**  
144 **in dendrites of ganglion cells belonging to the VIII cranial nerve. Deflection of stereocilia in vestibular**  
145 **hair cells requires a considerably higher stimulus level than that for stereocilia in cochlear hair cells.**  
146 **Welgampola et al. (2003) established electrophysiological vestibular thresholds (VEMPs) at sound**

147 levels, as defined at the cochlea, of 31 dB HL for BC stimulation, and 87 dB HL for AC stimulation. Even  
148 after adjusting for temporal integration with the brief duration stimuli used in electrophysiological  
149 testing, AC vestibular thresholds are 10 dB above, and BC vestibular thresholds 25 dB below, the 60  
150 dBA sound level typical of conversational speech (McNerney & Burkard, 2011). Thus, own voice is  
151 either not detected or is very weakly detected via an AC vestibular route. Whereas, unless using  
152 alaryngeal speech such as whispering, own voice will consistently be detected by a BC vestibular route.  
153 This BC vestibular audition of own voice will persist even if AC and BC cochlear audition of own voice is  
154 masked.

155

156 © Adapted by Max Gattie from illustrations by Servier Medical Art, <https://smart.servier.com>. Creative  
157 Commons 3.0 licence.

158

159 Estimating arrival times for own voice stimuli at the inner ear requires consideration of propagation  
160 routes (figure 2). Air-conducted (AC) sound can be direct (dAC) or reflected (rAC), whereas body-  
161 conducted (BC) vibration can be considered as direct only. Table 1 estimates arrival time at the inner ear  
162 at approximately 0.5 ms after vocalisation for both dAC sound and BC vibration. At 60 dBA stimulus levels  
163 (typical of vocalisation) BC vibration deflects both cochlear and vestibular mechanoreceptors (McNerney  
164 & Burkard, 2011; Welgampola, Rosengren, Halmagyi & Colebatch, 2003). Table 1 compares the  
165 propagation timings. Binaural coincidence detection across cochlear and vestibular mechanoreceptors,  
166 based on dAC sound and BC vibration, would identify own voice.

167

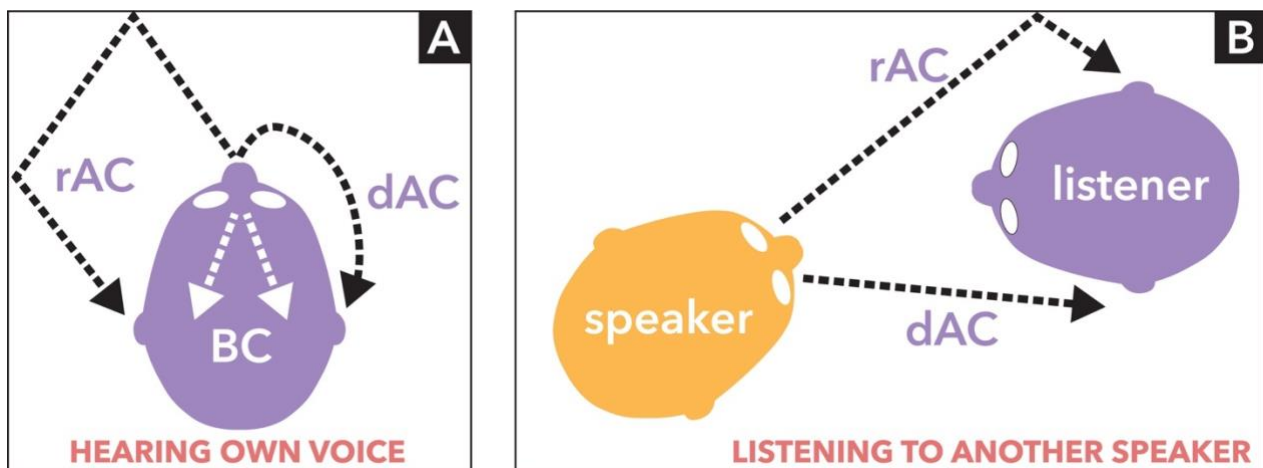

168

169 **Figure 2: Sound and vibration routes to the ear. Propagation routes are difficult to measure in vivo, and**  
170 **estimates here are derived from primary sources where possible. For general background on sound**  
171 **source perception, see Yost et al. (2008); and for propagation of sound and vibration see Fahy &**  
172 **Thompson (2015).**

173

174 **Air-conducted sound is split between reflected (rAC) and direct (dAC) routes (Cabrera et al., 2009;**  
175 **Traer & McDermott, 2016). These are shown in a simplified version. The rAC consists of many**  
176 **environmental reflections with comb filtering (frequencies attenuated or reinforced due to phase**  
177 **differences) as sound energy reaches the ear (Yadav et al., 2012; Arend et al., 2017). The many possible**  
178 **routes for rAC reflect the relationship between body and environment. If reflections of reflections are**  
179 **present (e.g. standing waves inside a room) rAC becomes reverberation. The dAC route is transmitted**  
180 **directly through the air around the speaker's head. This route includes body reflection, such as that**  
181 **from the shoulders. There is just one form of dAC, which will tend to be stable over the short-term**  
182 **(unless it is windy) and medium-term (unless the head rotates relative to the torso). Conditions in**  
183 **which dAC is unstable tend to also be ones in which conversation is difficult.**

**Weak vestibular response in persistent developmental stuttering and implications for own voice identification**

184  
185  
186  
187  
188  
189  
190  
191  
192  
193  
194  
195  
196  
197  
198  
199  
200  
201  
202  
203  
204  
205  
206  
207  
208  
209  
210  
211  
212  
213  
214  
215  
216  
217  
218

**(A) Transmission time estimates are based on human head dimensions, and will vary according to skull size and individual physiology. When hearing own voice, dAC sound is transmitted at 340 m/s and so will reach the ear in about 0.5 ms. Body conduction (BC) is through bone or soft tissue (Sohmer, 2017; Chordekar et al., 2018). Propagation routes are complex and frequency dependent, will differ between individuals, and have a nature not fully determined in vivo. However, the complexity of propagation routes will be stable in adults, changing only gradually with head composition and body profile across the lifespan. A propagation rate of 300 m/s is likely in humans (Hotehama & Nakagawa, 2012). If so, BC transmission time can be estimated as similar to the 0.5 ms for dAC. A distance of 1.5 cm between cochlear and vestibular hair cells (Ekdale, 2013) gives propagation time for vibration across the inner ear as 0.05 ms. This becomes an upper limit for arrival time difference from a laryngeal source, meaning BC arrival time is coincident to less than 0.05 ms for vestibular and cochlear mechanoreceptors. Routes to the ear for rAC will typically take 2–20 ms (depending on environmental parameters), and will be considerably less stable than for dAC or BC given that the environment, and the position of the head relative to surroundings, can be expected to change continuously.**

**(B) When listening to another speaker, dAC sound energy travelling a direct route between interlocutors is heard first. Energy travelling the longer, indirect route of rAC trails dAC slightly (e.g. by 5–10 ms, depending on environment). Thus, changes in firing rates of inner ear hair cells due to a typical 200 ms CV speech syllable travelling dAC and rAC routes will be spread over a further 2–50 ms or more, depending on proximity of interlocutors and environmental reflections. This overlaps with the time window for the Haas, or precedence, effect – a psychoacoustic phenomenon in which sounds separated by less than about 50 ms are perceptually integrated, with longer delays perceived as echo (Haas, 1951; Wallach et al., 1949). Overwhelmingly, dAC and rAC will have different presentations at each ear, along with comb filtering interactions, such that source localisation is via stereo combination following the duplex theory of Rayleigh (1907). There is in principle a confound for sound sources occupying the “cone of confusion” (a set of points equidistant from each ear) in symmetrical environments or those, like an anechoic chamber, with minimal rAC. In practice such a situation is so unlikely to be sustained that it would not normally have developmental impact (but see Cody et al., 1996). For animals with a pinna, filtering effects of the pinna reduce localisation inaccuracy for sources within the cone of confusion (Musican & Butler, 1984).**

© Creative Commons 4.0 licence.

| <b>HEARING OWN VOICE: Routes to each ear</b> |                   |                                 |                                       |                                                                                                                                                                                                                                      |
|----------------------------------------------|-------------------|---------------------------------|---------------------------------------|--------------------------------------------------------------------------------------------------------------------------------------------------------------------------------------------------------------------------------------|
| Route                                        | Sensory organ     | Arrival time after vocalisation | Interaural arrival time and intensity | Comment                                                                                                                                                                                                                              |
| BC                                           | Vestibular system | ~ 0.5 ms                        | Identical (assumes body symmetry)     | Insensitive to environmental variation. BC attenuation and filtering are consistent in the short- and medium-term, with only small and gradual long-term changes which follow head composition and body profile across the lifespan. |
| BC                                           | Cochlea           | ~ 0.5 ms                        |                                       |                                                                                                                                                                                                                                      |

| HEARING OWN VOICE: Routes to each ear |               |                                 |                                                                    |                                                                                                                                                                                                                                                                                                                                                                                                                                                        |
|---------------------------------------|---------------|---------------------------------|--------------------------------------------------------------------|--------------------------------------------------------------------------------------------------------------------------------------------------------------------------------------------------------------------------------------------------------------------------------------------------------------------------------------------------------------------------------------------------------------------------------------------------------|
| Route                                 | Sensory organ | Arrival time after vocalisation | Interaural arrival time and intensity                              | Comment                                                                                                                                                                                                                                                                                                                                                                                                                                                |
| dAC                                   | Cochlea       | ~ 0.5 ms                        | Near identical (can vary with head orientation and air turbulence) | During vocalisation, dAC and BC contributions are approximately equal at the cochlea (von Békésy, 1949; Pörschmann, 2000; Reinfeldt et al., 2010). Some spectral variation (e.g. nasal phonemes more prominent over BC) due to filtering differences between air and body. Recordings of own speech (capturing predominantly dAC) are often found by the speaker to differ from what is heard while speaking (a mixture of BC and dAC, with some rAC). |
| rAC                                   | Cochlea       | typically 2–50 ms               | Different                                                          | Arrives within 2–50 ms (or longer, depending on environment) of dAC sound and BC vibration. Less sonic/vibrational energy than the dAC/BC mixture. Delay relative to dAC/BC creates comb filtering. Delays of rAC above ~50 ms are experienced psychoacoustically as an echo; delays of rAC below ~50 ms are psychoacoustically fused with dAC/BC as in the Haas or precedence effect.                                                                 |

219  
220 **Table 1: Sound and vibrational energy is transmitted to each ear through body conduction (BC) and**  
221 **direct and reflected air conduction (dAC/rAC), and can deflect two sets of mechanoreceptors in each**  
222 **inner ear. At stimulus levels typical of own voice, vestibular mechanoreceptors are only deflected by**  
223 **BC vibration.**

224  
225  
226 Groups of neurons having response properties supporting coincidence detection on the millisecond  
227 timescales required for the hypothesised own voice identification mechanism can be found in the  
228 cochlear nucleus and superior olivary complex. Review of brainstem neurons can be found in Golding &  
229 Oertel (2012) and review of vestibular inputs to the cochlear nucleus in Newlands et al. (2003) or Smith  
230 (2012). Figure 3 shows a sagittal view of brain areas innervated by the inner ear, and figure 4 shows  
231 cortical areas with connectivity to the vestibular system alongside areas important for speech and  
232 language. The cochlear nucleus and superior olivary complex comprise initial stages in a subcortical chain  
233 referred to as the ascending auditory pathway (Irvine, 1992). Changes in firing rates within brainstem  
234 neurons which correspond to the hypothesised coincidence detection could in turn be expected to  
235 change activity at higher stages of the ascending auditory pathway, including inputs to the cortex. Such  
236 activity could be interpreted as an auditory stream which identifies own voice.

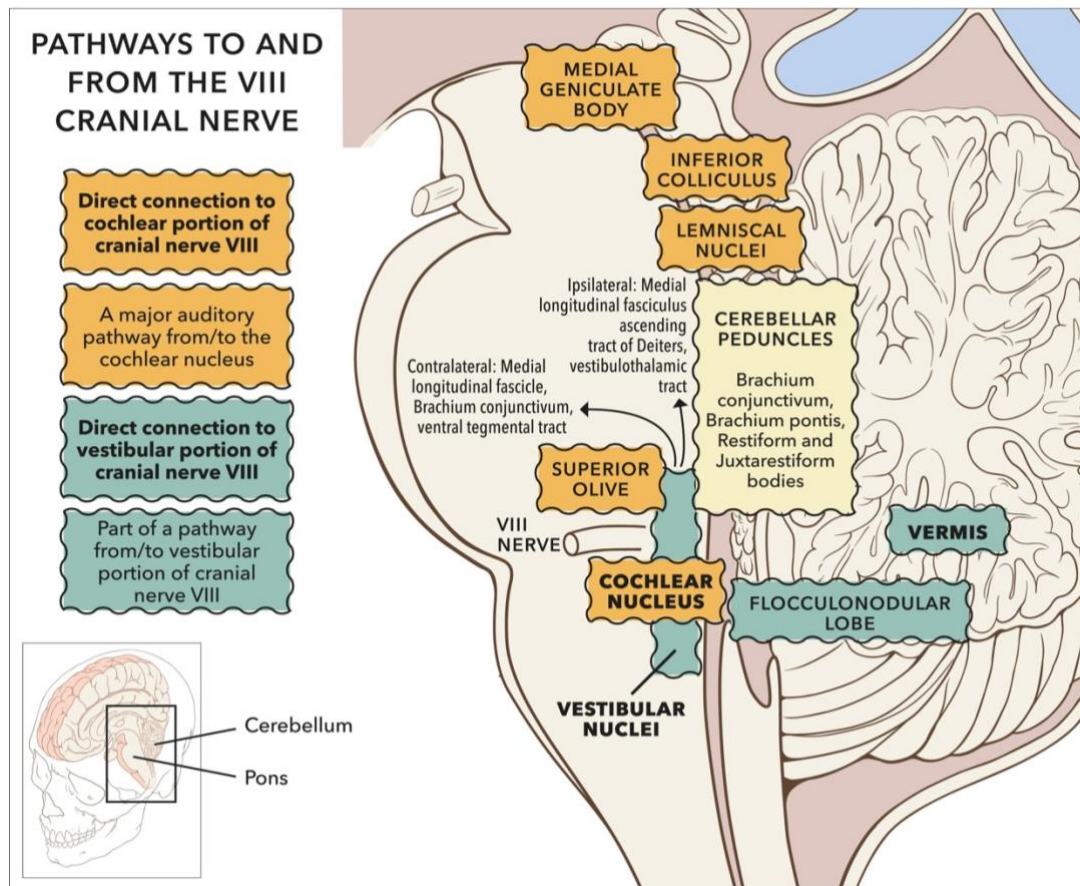

237

238 **Figure 3: Sagittal view of subcortical pathways to and from the VIII cranial nerve. Whilst the auditory**  
239 **pathway ascending from the cochlear nucleus is relatively well established (Irvine, 1992), pathways to**  
240 **and from vestibular nuclei remain under investigation (Pierrot-Deseilligny & Tilikete, 2008; Zwergal et**  
241 **al., 2009). Investigation is largely using animal models. Projections to vestibular cortex via the**  
242 **thalamus have been established in humans through clinical observation and lesion studies (Conrad et**  
243 **al., 2014; Hitier et al., 2014; Wijesinghe et al., 2015). Vestibular nuclei also project down the spine (not**  
244 **shown).**

245

246 © Portions of this figure were adapted from illustrations by Patrick J. Lynch, <http://patricklynch.net/>.  
247 Creative Commons 2.5 licence.

248

249



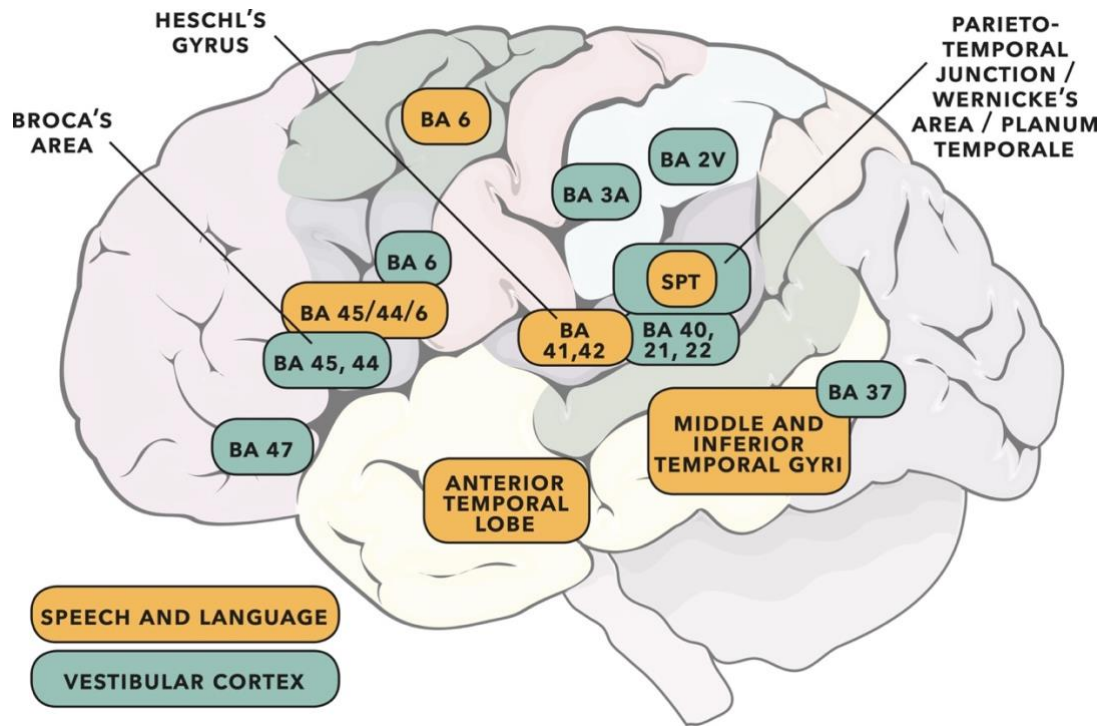

250  
251

252 **Figure 4: Cortical areas important for speech and language (adapted from the dual-stream model of**  
253 **Hickok & Poeppel, 2007) shown with vestibular cortical areas identified in cats, monkeys and humans**  
254 **(adapted from Ventre-Dominey, 2014; see also Frank & Greenlee, 2018). Cortical activity following**  
255 **vestibular input has wide interpretation (e.g. see reviews of cognition in Hitier et al., 2014, and**  
256 **auditory/rhythm/timing in Todd & Lee, 2015). Some of the vestibular areas identified will be**  
257 **predominantly related to gravito-inertial function (see discussion in Ferrè & Haggard, 2020). Numbers**  
258 **are Brodmann areas – see primary literature for more exact location detail. Spt is the Sylvian parieto-**  
259 **temporal region proposed by Hickok & Poeppel (2007) as a sensorimotor integration area. Vestibular**  
260 **sites in humans have been identified as such when direct electrical stimulation of the cortex gives rise**  
261 **to gravito-inertial illusion. When vestibular sites are identified within BA 21 (lateral temporal lobe) or**  
262 **BA 22 (Wernicke's area), auditory illusion is found to accompany gravito-inertial illusion (Kahane et al.,**  
263 **2003; Fenoy et al., 2006).**

264

265 © Portions of this illustration were adapted from Servier Medical Art, <https://smart.servier.com>.  
266 Creative Commons 3.0 licence.

267

268

### 269 *2.3.2.1 Explanatory Power*

270 As a process explanation, the Concurrency Hypothesis provides a detailed account of how own voice is  
271 identified. The proposed involvement of particular types of brainstem neurons (e.g. octopus cells in the  
272 cochlear nucleus, or bipolar principal cells of the medial superior olive) generates testable auxiliary  
273 hypotheses (see discussion in sections 2.4 and 3.4). Whereas the existence of an own voice auditory  
274 stream, which is identified through coincidence detection between vestibular and cochlear afferents, is  
275 the core hypothesis.

276 There is also a contrastive explanation of why own voice is identified in the way described by the  
277 Concurrency Hypothesis. The contrastive explanation addresses evolutionary and philosophical  
278 considerations. The Concurrency Hypothesis as described so far is specific to mammals. However, the  
279 Concurrency Hypothesis could be extended to all terrestrial and amphibious vertebrates if the basilar  
280 papilla is considered in place of the cochlea; to fish if the lagena is considered; and in principle to any

281 animal which produces sound and vibration, and has two or more sets of sensory receptors capable of  
282 detecting sound and vibration. See species surveys in Suthers, Tecumseh Fitch, Fay & Popper (2016) and  
283 Pollack, Mason, Popper & Fay (2019).

284 The prospect of such a wide taxonomic application for the Concurrency Hypothesis suggests a  
285 provenance early in evolution. This in turn prompts reconsideration of the role of the inner ear. The  
286 Concurrency Hypothesis provides a principled distinction between self (identification of own voice) and  
287 environment (reflection of own voice from surroundings). Such a distinction has importance for cognitive  
288 science and philosophy of mind (Wilson & Foglia, 2017). For example, in a representational theory of  
289 mind the distinction between self and environment is integral to content determination (Pitt, 2020).

290 The basis for the self-environment distinction in the Concurrency Hypothesis is the presence of two sets  
291 of mechanoreceptors in the ear. One set of mechanoreceptors detects own voice in isolation, the other  
292 detects own voice mixed with ambient sound, including reflection of own voice. This is dissimilar to other  
293 modalities. For example, the visual analogy would be identification of one's own hand. However,  
294 photoreceptors do not collect sufficient information to identify one's own hand from light waves incident  
295 on the retina. Such identification would be possible following multisensory integration, but this is also  
296 the case for audition (e.g. as in the combination of audition with proprioception during vocalisation).

297 As such, audition might be the only modality within which self and environment can be distinguished. If  
298 so, multisensory integrations including audition could underlie self-environment distinction for  
299 modalities other than audition. Evolution of any such dependency would have to create phenotypes  
300 sufficiently robust to account for self-environment distinction when hearing ability is absent. Further  
301 consideration of such matters is beyond the scope of this article, but would follow discussions of  
302 heritability and innateness such as those in Griffiths (2020), Godfrey-Smith & Sterelny (2016) or Downes  
303 & Matthews (2020).

304 Self-environment distinction is also important in our understanding of consciousness (Van Gulick, 2018).  
305 For example, our experience of qualia depends on introspection from what we presume to be a shared  
306 environment. Our intentionality towards objects other than ourselves rests likewise. From considerations  
307 such as these, provision of a principled basis for distinction between self and environment would be a  
308 comparably important function of the inner ear as its hearing function.

## 309 **2.4 Discussion**

310 This section describes a general application of the Concurrency Hypothesis to speech-motor research and  
311 auditory scene analysis. Section 3 will build on the discussion in this section to describe a specific  
312 application of the Concurrency Hypothesis to explanation of stuttering.

### 313 **2.4.1 Application to speech-motor research**

314 An own voice auditory stream would provide a target for the proposed efference copy of the speech plan  
315 in predictive feedback control models (e.g. Hickok & Poeppel, 2007; Roelofs & Meyer, 1999; Tourville &  
316 Guenther, 2011). If applied to speech-motor models, the Concurrency Hypothesis has potential to  
317 improve explanatory power.

318 A corollary of this proposal is that if the Concurrency Hypothesis is to be tested, speech-motor research  
319 should use physiologically valid own voice stimuli. Physiologically valid own voice stimuli are those  
320 containing concurrent AC sound and BC vibration, with relative composition and timing as described in  
321 figure 1 and table 1.

322 Creation of such stimuli carries practical difficulty. For example, an ideal test of speech-motor activity  
323 would compare brain activity during identical sound and vibrational stimuli in two conditions. The first  
324 condition is the standard articulatory process: brain activity generates sound and vibration following  
325 coordinated nerve impulses to articulatory muscles, whilst at the same time brain activity is altered  
326 following deflection of inner ear mechanoreceptors by the sound and vibration produced during  
327 articulation. The second condition should be identical to the first, but without the activity in articulatory  
328 muscles being created by brain activity. Instead, the measured brain activity would be solely in response  
329 to the sound and vibration produced by articulatory muscles. Unfortunately, the experimental  
330 arrangement in the second condition is difficult or impossible even in animal models. The articulatory  
331 muscles could in principle be made to produce sound and vibrational stimuli similar to that during  
332 vocalisation, for example through electrical stimulus to the articulatory muscles. However, the process of  
333 doing so would either be highly traumatic to the host animal, or the animal would have to be sedated.  
334 Whatever experimental arrangement is chosen, resting state brain activity in the second condition would  
335 differ from that of the first condition (the standard articulatory process) to the extent that comparison of  
336 brain activity between the two conditions would be overwhelmingly difficult to interpret.

337 Accordingly, much testing of brain activity during articulation, or vocalisation, has been based around a  
338 simpler comparison. The first condition is the standard articulatory process (i.e. as previously defined),  
339 with simultaneous recording of brain activity (e.g. by electrophysiology) and the sound and/or vibrations  
340 created during articulation (e.g. using a microphone). The second condition comprises a recording of  
341 brain activity without articulation, whilst the sound and/or vibration recorded in the first condition is  
342 played back. This comparison would seem to overcome the difficulty with having articulatory muscles  
343 create the sound and vibration in the second condition. However, there is a disanalogy in that the sound  
344 and vibration in the second condition are not identical to the sound and vibration in the first condition.  
345 This disanalogy has potential to invalidate the intended comparison.

346 Thus, protocols intended to compare brain activity during articulation and the playback of a recording of  
347 vocalisation must choose a methodology for recording and playback of the sound and/or vibration.  
348 Possibilities are shown in a Latin square in figure 5. Of these, speech-motor investigation has  
349 overwhelmingly compared the own voice condition with dAC playback of a dAC recording. Often,  
350 participants are invited to adjust sound pressure levels of dAC playback so as to perceptually match the  
351 loudness of the AC/BC combination heard during vocalisation. Doing so does not create a stimulus  
352 comparable to the stimulus present during vocalisation. Own voice is perceived through an  
353 approximately equal combination of air- and body-conducted stimuli (von Békésy, 1949; Pörschmann,  
354 2000; Reinfeldt et al., 2010). Perceptual doubling of the loudness of the AC stimulus, to compensate for  
355 the absence of BC stimulus, will for most participants correspond to no more than a 10 dB increase in  
356 sound pressure level (Stevens, 1972; Warren, 1973; Florentine, Popper & Fay, 2010). Such an increase  
357 will barely bring the AC stimulus to vestibular threshold, which for AC is 10 dB above the 60 dBA level  
358 typical of conversational speech. The AC vestibular threshold is moreover 35 dB above the BC vestibular  
359 threshold (McNerney & Burkard, 2011; Welgampola, Rosengren, Halmagyi & Colebatch, 2003).

## Weak vestibular response in persistent developmental stuttering and implications for own voice identification

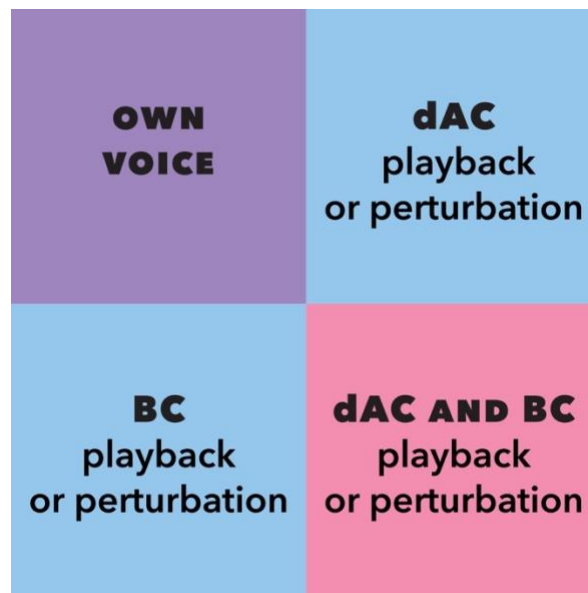

360

361 **Figure 5: Latin square showing sound and vibrational stimuli which could be used in brain studies of**  
362 **own voice audition. The “own voice” condition is the standard articulatory process. It includes speech-**  
363 **motor brain activity which results in articulation generating dAC and rAC sound, and BC vibration; and**  
364 **at the same time includes the brain activity following deflection of inner ear mechanoreceptors by the**  
365 **dAC and rAC sound, and BC vibration, produced during articulation. “Playback” refers to playback of**  
366 **recordings of sound or vibration made during the standard articulatory process. Playback conditions do**  
367 **not contain speech-motor activity, unless digitally processed playback with a short delay (usually 10 ms**  
368 **or more) is presented concurrently with ongoing articulation. Such short latency digital manipulation is**  
369 **referred to as perturbation, and may also include manipulations to recordings (e.g. frequency shifts or**  
370 **changes to the nature of formants). A limitation for any type of playback is that the sound and**  
371 **vibrational stimuli present in the own voice condition cannot be recreated exactly using the earphones**  
372 **and bone vibrators available in laboratories. Combined air- and body-conducted (AC/BC) playback**  
373 **according to the timings provided in table 1 (i.e. AC and BC playback with binaural arrival at the inner**  
374 **ear coincident to ~ 0.1 ms) offers the closest approximation to the sound and vibrational stimuli**  
375 **present in the own voice condition. Not shown in the diagram is that BC stimulus can be subdivided**  
376 **into levels above and below vestibular threshold. BC stimulus should be above vestibular threshold,**  
377 **and AC stimulus below vestibular threshold, to mimic stimuli present during articulation.**  
378

379 It follows that even after a sound pressure level increase to perceptually match the loudness of own  
380 voice, stimulation due to AC playback will either deflect vestibular mechanoreceptors very weakly in  
381 comparison to the BC stimulation present during vocalisation, or stimulation due to AC playback will not  
382 deflect vestibular mechanoreceptors at all. Firing rates of the vestibular ganglion will be altered barely or  
383 not at all from resting state. Action potentials along the VIII cranial nerve will predominantly be altered  
384 according to deflection of cochlear mechanoreceptors by AC playback, and an auditory stream  
385 corresponding to own voice will not be identified through coincidence detection between cochlear and  
386 vestibular streams as per the Concurrency Hypothesis.

387 Many functional imaging studies have compared vocalisation to AC playback of own voice recordings  
388 (e.g. with human participants: Numminen et al., 1998; Numminen & Curio, 1999; Curio et al., 2000; Ford  
389 et al., 2001; Houde et al., 2002; Ford & Mathalon, 2004; Ventura et al., 2009; Greenlee et al., 2011; Sato  
390 & Shiller, 2018; or using animal models: Müller-Preuss & Ploog, 1981; Eliades & Wang, 2017; Eliades &  
391 Tsunada, 2018). A consistent finding in such experiments is that parts of temporal cortex which respond

392 to sound have reduced activity in the vocalisation condition compared to the playback condition. This has  
393 been interpreted as speech-motor activity modulating the temporal cortex (Hickok et al., 2011; Parrell &  
394 Houde, 2019). The interpretation is consistent with theoretical models in which attenuating auditory  
395 feedback increases accuracy of state estimates of the speech-motor system (Parrell et al., 2019).

396 Whilst an attractive explanation, motor induced suppression of temporal cortex is not strongly supported  
397 by studies comparing vocalisation and AC playback conditions. The reason for this is that vocalisation and  
398 playback stimuli differ (as per figure 5), meaning that the observed reduction in temporal cortex activity  
399 cannot conclusively be attributed to speech-motor activity modulating temporal cortex. An alternative  
400 explanation is that the observed reduction in temporal cortex activity is due to the difference in stimuli  
401 between vocalisation and AC playback conditions. The Concurrency Hypothesis is consistent with this  
402 alternative explanation. The Concurrency Hypothesis adds the detail that in the vocalisation condition,  
403 firing rates of neurons in the ascending auditory pathway will uniquely identify own voice through  
404 coincidence detection of cochlear and vestibular afferents. Whereas in the AC playback condition, the  
405 ascending auditory pathway functions as it would with any ambient AC stimulus (i.e. as per Irvine 1992;  
406 Bregman, 1990).

407 It is possible that both explanations are correct: that an own voice auditory stream modifies temporal  
408 cortex activity, and that articulation modifies temporal cortex activity independently of audition.  
409 Exploring these possibilities offers the opportunity to increase explanatory power of speech-motor  
410 models, and to make testable predictions. In doing so it is not necessary to use the Concurrency  
411 Hypothesis. However, alternatives would be to propose a different method by which own voice is  
412 identified as an ascending auditory stream (i.e. a solution to the ill-posed problem of sound source  
413 discrimination in auditory scene analysis), or else to stipulate that an auditory target map for own speech  
414 is innately specified (e.g. as per Liberman & Mattingly, 1985).

415 Studies using playback of own voice recordings could be reinterpreted in light of these considerations,  
416 and extended to include BC stimuli. Auditory perturbation studies could be similarly reinterpreted (e.g.  
417 McGuire et al., 1996; Hirano et al., 1997; Fu et al., 2006; Parkinson et al., 2012; Toyomura et al., 2007;  
418 Zarate & Zatorre, 2008; Tourville et al., 2008; Zheng et al., 2009; Zarate et al., 2010). In auditory  
419 perturbation studies, vocalisation is recorded, is optionally digitally manipulated, and is played back with  
420 a short delay whilst articulation is ongoing. Examples of manipulation include frequency shift or  
421 alteration of formants. Recording and playback use AC sound. Digital processing (e.g. with fast Fourier  
422 transform) introduces delays which are typically 10 ms or more. Such delays are at least an order of  
423 magnitude larger than the sub-millisecond timings in table 1. Thus, auditory perturbation studies assess  
424 the effect of keeping the BC vibrational stimulus of vocalisation unchanged, whilst adding a delayed AC  
425 stimulus having similar spectral characteristics to the ongoing vocalisation. Effectively they manipulate  
426 rAC and (if using insert earphones) attenuate dAC. The protocol could be extended to form part of a  
427 larger range of investigation in which BC, and combined AC/BC, manipulations are also evaluated.

428 The Latin square in figure 5 is a simplification. Stimuli can be further subdivided into those above and  
429 below vestibular threshold. Todd et al. (2014a, 2014b) compared cortical response to stimuli above and  
430 below vestibular threshold. Electroencephalography showed morphological change in and around the N1  
431 wave upon crossing vestibular threshold, with source analysis indicating origin in cingulate or temporal  
432 cortex. The N1 wave (or its M100 equivalent in magnetoencephalography) is the component found to  
433 have reduced amplitude when brain activity during vocalisation is compared to brain activity during AC  
434 playback of vocalisation. Thus, the suggestion is that in studies comparing vocalisation and playback  
435 conditions, the observed brain activity will differ depending on whether playback stimuli are above or

436 below vestibular threshold. A physiologically valid own voice stimulus will combine BC stimulus above  
437 vestibular threshold with AC stimulus below vestibular threshold. Follow-up work to the current article  
438 will appraise brain activity following combinations of BC and AC stimuli which are respectively above and  
439 below vestibular threshold.

#### 440 **2.4.2 Application to Auditory Scene Analysis**

441 Bregman (1990) proposed that auditory scenes are generated from the neural firing patterns elicited  
442 when sound waves are coincident on the biomechanical structure of the middle and inner ears. Auditory  
443 scenes would contain detail consistent with our perceptual experience. Two processes are proposed to  
444 identify the auditory streams which comprise auditory scenes. Firstly, primitives, which are general  
445 purpose segregation and grouping processes based on those developed by the Gestalt school (e.g.  
446 common onset, harmonicity, spectral composition, co-variation in amplitude; Carlyon, 2004; Darwin,  
447 2007; Ciocca, 2008; Denham & Winkler, 2015; Młynarski & McDermott, 2019). Secondly, schemas, which  
448 are specific processes identifying certain types of sound (e.g. conspecific animal vocalisations or  
449 phonemes in human speech; Bey & McAdams, 2002; Billig et al., 2013; Woods & McDermott, 2018).

450 The Concurrency Hypothesis could be the basis of a schema identifying own voice. Modelling of auditory  
451 scene analysis is an active research area (Cooke & Ellis, 2001; Haykin & Chen, 2005; Snyder & Alain, 2007;  
452 Winkler et al., 2009; Szabó, Denham & Winkler. 2016; Snyder & Elhilali, 2017; Chakrabarty & Elhilali,  
453 2019). Whichever modelling approach is taken, the Concurrency Hypothesis would be applied through  
454 the following principles:

- 455 i. Primitive processes are proposed to act on neural firing patterns elicited by deflection of  
456 vestibular mechanoreceptors as well as by deflection of cochlear mechanoreceptors.
- 457 ii. Whenever firing patterns of vestibular and cochlear origin have similar attributes as identified by  
458 primitives, the firing patterns are likely to correspond to own voice.
- 459 iii. Activity in the auditory brainstem (BinKhamis et al., 2019) is consistent with substantial  
460 processing of speech sounds. As such, models will have greater neurological plausibility if the  
461 coincidence detection in (ii) occurs very early in the ascending auditory pathway – for example, in  
462 the cochlear nucleus or the superior olivary complex.
- 463 iv. Computational modelling of coincidence detection (e.g. through vestibular input to octopus cells  
464 in the cochlear nucleus) may require primitives and schemas to be entwined.

465 An own voice identification schema based on (i – iv) could underpin further schemas. Possibilities are:

- 466 v. Vocalisation of conspecifics is likely to be occurring when primitives identify similar neural firing  
467 patterns (e.g. spectral composition typical of formants) to those present during own voice  
468 coincidence detection, but when vocalisation is not being produced and neural firing patterns  
469 arise from cochlear mechanoreceptors only.
- 470 vi. If stored in short-term memory, an own voice auditory stream could be compared via primitives  
471 to the rAC reflections of own voice (see figure 2 and table 1) to create a schema identifying  
472 reflection and reverberation.
- 473 vii. Multisensory integration (Stein & Stanford, 2008) of reflections and reverberations from (vi) with  
474 head and body position could support a schema for echolocation (see review of human  
475 echolocation in Kolarik et al., 2014).
- 476 viii. Sound source learning based on (vii), in combination with the generalised vocalisation schema of  
477 (v), could support a schema distinguishing sources in multi-speaker scenarios.

478 ix. Adaptation of the schema in (viii) for sounds other than vocalisation could reinforce learning of  
479 sound source location using primitives.

480 These ideas need development into computational models. The underlying point is that many or all of  
481 the schemas required by auditory scene analysis could be based on the Concurrency Hypothesis. The high  
482 energy vocalisations of neonates (e.g. crying or wailing) have more than sufficient energy to deflect both  
483 cochlear and vestibular mechanoreceptors, meaning that auditory learning based on the Concurrency  
484 Hypothesis would begin at birth (and quite possibly, would have a precursor based on the mother's voice  
485 in utero).

### 486 3. Hypotheses of Stuttering

#### 487 3.1 Explanatory targets

488 Explanatory targets for stuttering are extensive. Table 2 shows process explananda (how stuttering  
489 happens), whilst table 3 shows contrastive explananda (why stuttering happens). These lists are not  
490 intended as exhaustive, but are rather presented as minimal criteria which any hypothesis of stuttering  
491 should address.

492 Priority will be given to addressing process explananda. This is not to downplay the importance of  
493 contrastive explananda for stuttering research. However, a comprehensive discussion of contrastive  
494 explananda for stuttering (e.g. why there is a sex difference; the role of heredity; whether a particular  
495 brain study reflects causation, consequences or correlates of stuttering) encompasses issues wider than  
496 those within stuttering research, and is accordingly outside the scope of this article. The current aim is of  
497 adequacy for process explanans, with contrastive explanans added as part of ongoing research.

498

| Explananda                                       | Examples                                                                                                                                                                                                                                                                                                                                                                                                                                                                                                                                                        | References                                                                                                                                                                                                                        |
|--------------------------------------------------|-----------------------------------------------------------------------------------------------------------------------------------------------------------------------------------------------------------------------------------------------------------------------------------------------------------------------------------------------------------------------------------------------------------------------------------------------------------------------------------------------------------------------------------------------------------------|-----------------------------------------------------------------------------------------------------------------------------------------------------------------------------------------------------------------------------------|
| Core stuttering behaviours                       | Prolongation or repetition of speech sounds, including silent blocks to airflow.                                                                                                                                                                                                                                                                                                                                                                                                                                                                                | Van Riper (1982 ,ch 6);<br>Bloodstein (1995, ch 1–2);<br>Ward (2006, ch 1, 7, 9)                                                                                                                                                  |
| Accessory and interiorised stuttering behaviours | Accessory stuttering includes excess tension or tremor in articulatory muscles; perseveration; changes in breathing; use of fixed posture; postponement of words or substitution of synonyms; and movement of non-articulatory muscles, including limb movements, especially in attempts to time or disguise movement of articulatory muscles. Interiorised stuttering adds word, phoneme or situation fears; situation avoidance; frustration, hostility and guilt. See Iverach et al. (2017) for discussion of overlap between stuttering and social anxiety. | Van Riper (1982 ch 6, 7, 11);<br>Bloodstein (1995, ch 1–2);<br>Ward (2006, ch 1, 7, 9)<br>Iverach et al. (2017)                                                                                                                   |
| Linguistic and/or situational                    | Stuttering increases with propositionality of content. Stuttering is reduced when speaking alone or to animals. Stuttering increases when talking to authority figures, or when the audience appears distracted. Stuttering is mostly word initial, and almost never on the last sound of a word or syntactic structure. Stuttering tends to occur at the beginning of a sentence or grammatical clause. Accented syllables are more likely to be stuttered. Adults tend                                                                                        | Richels et al. (2010);<br>Buhr & Zebrowski (2009);<br>Bloodstein (2002, 2006);<br>Ward (2006, ch 5);<br>Karniol (1995);<br>Bloodstein (1995, ch 7);<br>Van Riper (1982 ch 8);<br>Langová & Sváb (1973);<br>Sheehan et al. (1967); |

**Weak vestibular response in persistent developmental stuttering and implications for own voice identification**

|                                                   |                                                                                                                                                                                                                                                                                                                                |                                                                                                                                               |
|---------------------------------------------------|--------------------------------------------------------------------------------------------------------------------------------------------------------------------------------------------------------------------------------------------------------------------------------------------------------------------------------|-----------------------------------------------------------------------------------------------------------------------------------------------|
|                                                   | to stutter on longer words, on words starting with consonants, and on words with low transition probability (high information load). Adults tend to stutter on content rather than function words, and vice versa for children.                                                                                                | Gould & Sheehan (1967);<br>Eisenson & Horowitz (1945)                                                                                         |
| Anticipation, Consistency and Adjacency           | People who stutter can predict when stuttering will occur with high accuracy. In successive oral readings of the same material, stuttering tends to occur on the same syllables. If previously stuttered words are blotted out, stuttering on subsequent readings tends to be on words adjacent to those previously stuttered. | Garcia-Barrera & Davidow (2015);<br>Brocklehurst et al. (2013);<br>Jackson et al. (2015);<br>Bloodstein (1995, ch 7);                         |
| Adaptation                                        | Stuttering is reduced in successive oral readings of the same material (occurs simultaneously with the consistency effect).                                                                                                                                                                                                    | Brocklehurst et al. (2013);<br>Max & Baldwin (2010);<br>Bloodstein (1995, ch 8);<br>Wingate (1986 a,b)                                        |
| Operant conditioning                              | Stuttering is reduced in response-contingent stimulation experiments (e.g. when using electric shock or time out during stuttered moments).                                                                                                                                                                                    | Ingham (1984, ch 9);<br>Nittrouer & Cheney (1984);<br>Bloodstein (1995, ch 8)                                                                 |
| Alteration to audition during speech              | Many changes to audition during speech can reduce stuttering. Effective changes include delay; frequency shift; masking; and unison speaking with, or shadowing of, a second speaker.                                                                                                                                          | Bloodstein (1995, ch 2,8);<br>Van Riper (1982 ch 15);<br>Ingham (1984, ch 10);<br>Ward (2006, ch 3);<br>Howell et al. (1987);<br>Yates (1963) |
| Alteration to stress patterns within vocalisation | Speaking in time with a metronome reduces stuttering, as does singing.                                                                                                                                                                                                                                                         | Van Riper (1982 ch 15, 17);<br>Bloodstein (1995, ch 2,8);<br>Wingate (1969)                                                                   |
| Therapy effectiveness                             | Interventions for stuttering have an overall positive effect, although some stuttering usually remains post-intervention. Methodical comparison of interventions is difficult. No intervention is clearly preferred.                                                                                                           | Johnson et al. (2015);<br>Baxter et al. (2015);<br>Herder et al. (2006);<br>Ward (2006 ch 15)                                                 |

499  
500  
501  
  
502

**Table 2: Process explananda for stuttering**

| Explananda   | Examples                                                                                                                                                                                                                                                                                                                                                                                                                                                                                                            | References                                                                                                                 |
|--------------|---------------------------------------------------------------------------------------------------------------------------------------------------------------------------------------------------------------------------------------------------------------------------------------------------------------------------------------------------------------------------------------------------------------------------------------------------------------------------------------------------------------------|----------------------------------------------------------------------------------------------------------------------------|
| Age of onset | Childhood stuttering has a median age of onset between 3–4 years, with a positively skewed distribution and upper limit around 9–12 years. Childhood cases are mostly developmental, but some may be acquired (neurogenic or psychogenic). See Ward (2006, ch 7), Yairi (2007) or Seery et al. (2007) for review of subtypes in children and Van Borsel (2014) for review of acquired stuttering. Adult onset is rare. Adult onset may be acquired, and/or re-emergent childhood stuttering (Van Riper, 1982, p64). | Yairi & Ambrose (2013);<br>Bloodstein (1995 ch 3,6);<br>Craig et al. (2002);<br>Månsson (2000);<br>Andrews & Harris (1964) |
| Heredity     | Averaging across seven twin studies gives a heritability estimate for PDS at 70% (95% CI 59–81%, studies compiled in Frigerio-Domingues & Drayna, 2017). Prospective genetic variations for stuttering have been identified through linkage analysis. Knock-                                                                                                                                                                                                                                                        | Benito-Aragón et al. (2020)<br>Frigerio-Domingues & Drayna (2017);<br>Kraft & Yairi (2012);<br>Ward (2006, ch 7);          |



**Weak vestibular response in persistent developmental stuttering:**

**Implications for own voice identification**

|                                              |                                                                                                                                                                                                                                                                                                                                                                                                                                                                                                                                                                                                                                                                                                                                                                                                                                                                                                                                                                                                                                                                                                                                                                                          |                                                                                                                                                                                                      |
|----------------------------------------------|------------------------------------------------------------------------------------------------------------------------------------------------------------------------------------------------------------------------------------------------------------------------------------------------------------------------------------------------------------------------------------------------------------------------------------------------------------------------------------------------------------------------------------------------------------------------------------------------------------------------------------------------------------------------------------------------------------------------------------------------------------------------------------------------------------------------------------------------------------------------------------------------------------------------------------------------------------------------------------------------------------------------------------------------------------------------------------------------------------------------------------------------------------------------------------------|------------------------------------------------------------------------------------------------------------------------------------------------------------------------------------------------------|
|                                              | in mice carrying one of these variations show stuttering in their ultrasonic vocalisations (Han et al. 2019).                                                                                                                                                                                                                                                                                                                                                                                                                                                                                                                                                                                                                                                                                                                                                                                                                                                                                                                                                                                                                                                                            | Bloodstein (1995, ch 3)                                                                                                                                                                              |
| Incidence and prevalence                     | Incidence (fraction of the population who have ever stuttered) is between 5–8%. Lifespan prevalence (fraction of the entire population who stutter) is 0.72%, but prevalence can be much higher (e.g. 2–4%) with cohorts aged younger than 12 years, and especially those between 2–6 years.                                                                                                                                                                                                                                                                                                                                                                                                                                                                                                                                                                                                                                                                                                                                                                                                                                                                                             | Yairi & Ambrose (2013); Bloodstein (1995 ch 3,6); Craig et al. (2002); Månsson (2000); Andrews & Harris (1964)                                                                                       |
| Sex differences                              | At the typical onset age of 3-4 years old, about 1.5 times more boys than girls stutter. By adulthood, 3 or 4 times more men than women will stutter. Thus, boys are more likely than girls to start stuttering. And girls are more likely than boys to stop stuttering. Drayna et al. (1999) find PWS are more likely to be male in cases with no family history of stuttering (see also Ambrose et al., 1997).                                                                                                                                                                                                                                                                                                                                                                                                                                                                                                                                                                                                                                                                                                                                                                         | Yairi & Ambrose (2013); Bloodstein (1995 ch 3,6); Craig et al. (2002); Månsson (2000); Andrews & Harris (1964)                                                                                       |
| Childhood stuttering is frequently transient | Incidence and prevalence data show many children who stutter (60–80%) will stop stuttering, with or without intervention. Systematic review of 35 studies (Sugathan et al., 2020) indicates speech features as predictive of stuttering continuing into adulthood (more stuttering-like dysfluencies including dysrhythmic phonation and monosyllabic word repetition; higher articulatory rate; lower score in phonology tests). Meta-analysis of 11 studies (Singer et al., 2020) adds predictors of: male sex; greater age at onset; heredity; and lower scores in tests of language skills.                                                                                                                                                                                                                                                                                                                                                                                                                                                                                                                                                                                          | Yairi & Ambrose (2013); Sugathan et al. (2020); Singer et al. (2020)                                                                                                                                 |
| Co-occurring diagnoses                       | Blood et al. (2003), in a survey of 1184 speech and language pathologists (SLPs), found 37% of 2628 children who stuttered had no co-occurring diagnosable condition. The remaining 63% had an average of 2.2 co-occurring diagnosable conditions. Of these, 33.5% were articulatory, 25.6% concerned expressive or receptive semantics, and 34.5% were non-speech-language (including learning, literacy, attention deficit and central auditory processing). An earlier survey of SLPs (Arndt & Healey, 2001) found 44% of 467 children who stuttered had a co-occurring phonological and/or language diagnosis. There is overlap between stuttering and dyslexia (Elsherif et al., 2021). Generalised household surveys also show a high co-occurrence for stuttering with other developmental categories in self or parent report. Retrospective self-report from adults with latent class analysis (Ajdacic-Gross et al., 2018; see also 2010), established association with atopic disease (e.g. allergy or asthma); psychosocial adversity in childhood; or neurodevelopmental or early anxiety disorder. However, such co-occurrences were only present in one of two subgroups. | Elsherif et al. (2021); Briley & Ellis (2018); Ajdacic-Gross et al. (2018); Ajdacic-Gross et al. (2010); Boulet et al. (2009); Blood et al. (2003); Arndt & Healey (2001); Bloodstein (1995, ch 4–6) |
| Subtle differences from controls             | Subtle differences can be found between adults or children who do and do not stutter for tasks involving general motor control. Sometimes differences in the integration of motor control with timing systems, and/or sensory or proprioceptive input, are implied. Examples include movement initiation latency and movement duration, and                                                                                                                                                                                                                                                                                                                                                                                                                                                                                                                                                                                                                                                                                                                                                                                                                                              | Choo et al. (2020); Ofoe et al. (2018); Ntourou et al. (2011); Max (2004); Bloodstein (1995); Rosenfield & Jerger (1984)                                                                             |

|                   |                                                                                                                                                                                                                                                                                                                                                                                                                                                                                                                                                                                                                                                                                    |                                                                                     |
|-------------------|------------------------------------------------------------------------------------------------------------------------------------------------------------------------------------------------------------------------------------------------------------------------------------------------------------------------------------------------------------------------------------------------------------------------------------------------------------------------------------------------------------------------------------------------------------------------------------------------------------------------------------------------------------------------------------|-------------------------------------------------------------------------------------|
|                   | involve use of effectors such as fingers and hands as well as use of the orofacial system (Max, 2004). Subtle differences are also found in many tests of central auditory function (review in Rosenfield & Jerger, 1984). Meta-analysis of language tests in children who stutter (receptive and expressive vocabulary, mean length of utterance, syntactic complexity, homogeneity analysis) shows subtle rather than clinically significant differences from controls (Ntourou et al., 2010). Similarly subtle differences between children who do and do not stutter are reported in tests related to attention and executive function (Ofoe et al., 2018; Choo et al., 2020). |                                                                                     |
| Neurotransmitters | Positron Electron Tomography and drug trials indicate that neurotransmitters influence stuttering behaviour. Dopamine levels appear particularly important.                                                                                                                                                                                                                                                                                                                                                                                                                                                                                                                        | Maguire et al. (2020); Metzger et al. (2017); Wu et al. (1997)                      |
| Neuroimaging      | Differences from controls in areas important for auditory, language and speech-motor function. See discussion in section 3.4.1.                                                                                                                                                                                                                                                                                                                                                                                                                                                                                                                                                    | Etchell et al. (2017); Neef et al. (2015); Belyk et al. (2015); Budde et al. (2014) |

503

504 **Table 3: Contrastive explananda for stuttering**

505

506

### 507 **3.2 Candidate explanations**

508 Bloodstein (1995) categorises hypotheses of the moment of stuttering into three groups: repressed  
 509 needs, anticipatory struggle, and breakdown. Research and theoretical development over the last 30  
 510 years has overwhelmingly focussed on breakdown hypotheses. As such, repressed needs hypotheses and  
 511 anticipatory struggle hypotheses will be reviewed only in brief, whilst breakdown hypotheses will be  
 512 described in greater detail.

#### 513 **3.2.1 Repressed Needs Hypotheses**

514 Originating in the psychoanalytic schools of the 1920s and 1930s, repressed needs hypotheses describe  
 515 stuttering as a neurotic symptom rooted in unconscious needs. Such hypotheses are outside the  
 516 mainstream of contemporary stuttering research (Martin, 2016).

#### 517 **3.2.2 Anticipatory Struggle Hypotheses**

518 In anticipatory struggle hypotheses, stuttering is preceded by the speaker's prediction that speech will be  
 519 difficult to execute. The prediction of difficulty leads to increased muscular tension. The increased  
 520 muscular tension in turn impairs the coordination usually present during speech, and causes the speech  
 521 attempt to be stuttered.

522 Anticipatory struggle hypotheses have seen little development in the last 50 years. For a historical survey,  
 523 see Bloodstein (1995, ch 2), and for a contemporary perspective see Brocklehurst et al. (2013).

#### 524 **3.2.3 Breakdown Hypotheses**

525 In breakdown hypotheses, stuttering is a behavioural manifestation of vulnerability in speaking ability.  
 526 The vulnerability is generally proposed to occur in either the language encoding or the speech-motor

527 system. Breakdown of the vulnerable system is typically attributed to emotional or psychosocial stress  
528 (Bloodstein, 1995, p60).

### 529 *3.2.3.1 Language encoding breakdown*

530 Language encoding breakdown has been described in what Levelt (1989, 1999) refers to as the  
531 Formulator. This is a hypothesised stage of speech production between thought and expression, in which  
532 lexical and syntactic selection, along with morphological, phonological and phonetic encoding, precedes  
533 creation of a motor plan. Levelt's model is shown in figure 6. The Formulator can be described using a  
534 spreading activation network (e.g. Dell, 1986; Dell & O'Seaghdha, 1991). In network models, a metrical  
535 frame is created for a planned utterance. Phonological segment nodes will then compete for selection,  
536 with the nodes filling the frame being those which have the highest activation level at the moment when  
537 speech-motor planning commences.

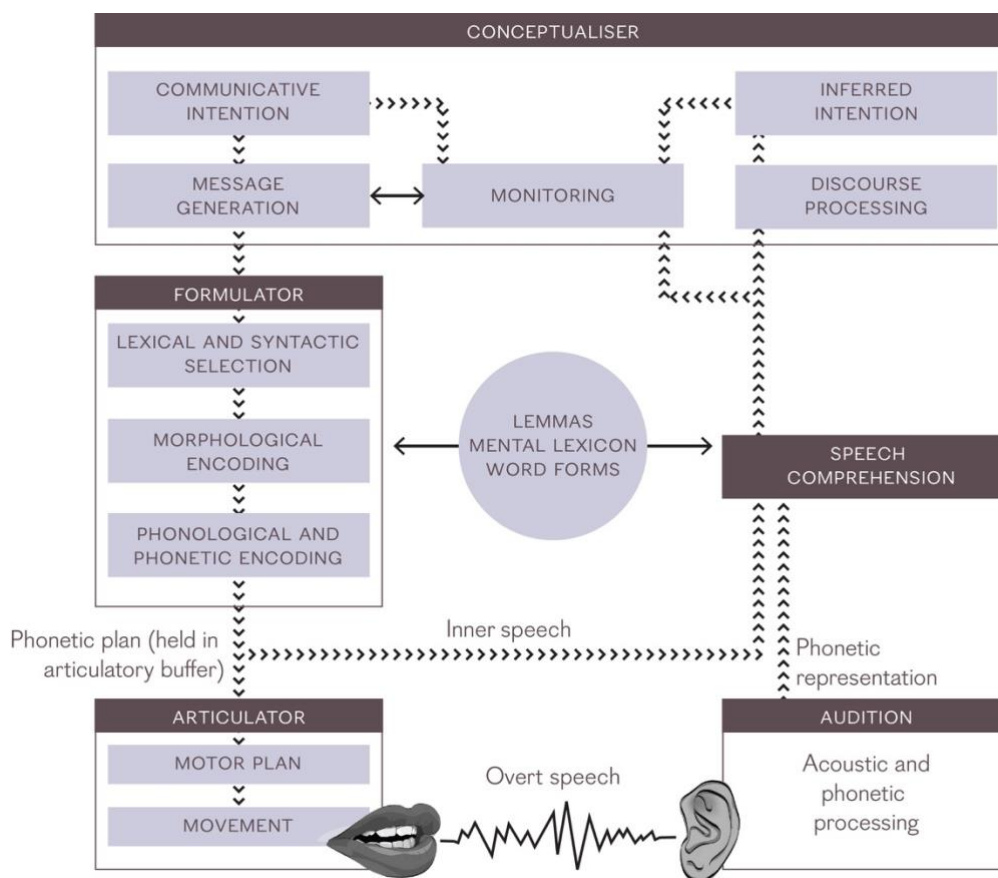

538

539 **Figure 6: Speech production model of Levelt (1989; see also Levelt et al., 1999). Notable features are an**  
540 **inner and an outer loop, with the parsimony of a shared mental lexicon. Stages include Audition,**  
541 **Speech Comprehension, Conceptualisation, Formulation and Articulation. The Concurrency Hypothesis**  
542 **concerns activity in Audition, and thus addresses a special case of auditory scene analysis (Bregman,**  
543 **1990). Discussion of Speech Comprehension can be found in Norris et al. (2000), Galantucci et al.**  
544 **(2006) or Poeppel et al. (2008), among others. There is no widely agreed model of the Conceptualiser;**  
545 **any effort to produce one touches on long-standing issues in Cognitive Science, Philosophy of**  
546 **Psychology and Philosophy of Mind (several other hypotheses of the Levelt model, and hypotheses of**  
547 **its constituents, do likewise). Indefrey & Levelt (2004) present a meta-analysis, based on neuroimaging**  
548 **literature, of the time course for processes within the Formulator; see also section 3.2.3.1 for**  
549 **discussion of Dell's (1986) spreading activation network model of the Formulator. Articulation is**  
550 **described by speech-motor control models such as DIVA (Guenther et al., 2006) or FACTS (Parrell et al.,**  
551 **2019).**

552  
553 © Creative Commons 4.0 licence. Based on Levelt (1989), Levelt et al. (1999), Indefrey & Levelt (2004).  
554

555 The Covert Repair Hypothesis (Postma & Kolk, 1993) postulates slower than usual activity in the  
556 Formulator for PWS. As a result, a speech plan may be created whilst nodes are still competing for  
557 selection. If inappropriate nodes are selected, two possibilities pertain. If the inappropriate nodes are  
558 detected prior to articulation (e.g. via an internal monitoring loop), they are repaired covertly. This repair  
559 manifests as a silent pause – the speaker wishes to continue, but cannot do so at that moment.  
560 Alternatively, if inappropriate nodes are detected during articulation, the speaker will stop and retrace.  
561 Phonemes uttered prior to retrace are audible as stuttering for however many reformulations are  
562 necessary to correct the speech plan. A variant on this theme is offered by the Vicious Circle Hypothesis  
563 (Vasić & Wijnen, 2005; Bernstein Ratner & Wijnen, 2007), which proposes that it is over-vigilance in  
564 repair, rather than slower than usual formulation, which causes stuttering.

565 An alternative breakdown mechanism is described by Howell (2004, 2008). In the EXPLAN hypothesis,  
566 breakdown occurs when the rate of speech planning has fallen below that of execution. The available  
567 speech plan is repeatedly executed until a continuation of the speech plan is available. EXPLAN entails  
568 aspects of both psycholinguistic and speech-motor breakdown. The Variable Release Threshold  
569 hypothesis (Brocklehurst et al., 2013) modifies EXPLAN such that the release threshold for a phoneme  
570 will vary according to a modified version of Bloodstein's (1975) account of anticipatory struggle.

### 571 *3.2.3.2 Speech-motor breakdown*

572 Speech-motor breakdown is typically investigated through comparison of people who stutter in fluent  
573 versus stuttered speech (state comparison) or people who do and do not stutter during fluent speech  
574 (trait comparison). Outcome measurement is via neuroimaging, electromyography of articulatory  
575 muscles, or a hybrid design (e.g. studies employing transcranial magnetic stimulation). Differences are  
576 reliably and repeatedly established in both trait and state comparisons, and are present even below the  
577 threshold for behavioural observation of stuttered speech (Etchell et al., 2017; Neef et al., 2015; Belyk et  
578 al., 2015; Budde et al., 2014). Brain areas frequently identified include premotor cortex and the temporo-  
579 parietal junction (including white matter connecting those areas), the cerebellum, and the basal ganglia.  
580 Stuttering can be emulated neurocomputationally by modelling the brain activity observed in  
581 neuroimaging of stuttering (Civier et al., 2013), with over-reliance on auditory feedback a contributing  
582 factor (Max et al., 2004; Civier et al., 2010). Arenas (2017) proposes an extension to speech-motor  
583 breakdown in which fluctuations in the vigilance of the monitoring system account for the contextual  
584 variability of stuttering.

585

## 586 **3.3 A Novel Account of Stuttering: REMATCH** 587 **(Reflexivity and Communicative Mismatch)**

### 588 **3.3.1 Introduction**

589 This section introduces a novel account of stuttering with two core hypotheses: Reflexivity, and  
590 Communicative Mismatch. The combination is referred to as REMATCH.

591

592 The first core hypothesis in REMATCH concerns a quale referred to as “reflexivity”. It proposes that PWS  
593 have a subjective experience during speaking in which their own speech has increased salience in  
594 comparison to the way that people who do not stutter experience their own speech while speaking. The  
595 second describes communicative mismatch, in which a breakdown in communicative choreography  
596 between speaker and listener engenders observable stuttering behaviour. The reflexivity proposal  
597 develops the Concurrency Hypothesis described in section 2. It is a distal cause of stuttering relative to  
598 communicative mismatch.

599 This section will proceed as follows. The sequence of events leading to a moment of stuttering,  
600 consistent with the two core hypotheses, will be described. The core hypotheses will then be applied to  
601 the explananda in tables 2 and 3.

### 602 *3.3.2 Increased Reflexivity*

603 Consider that the subjective experience of seeing the colour red may differ between individuals, even if  
604 those individuals can mutually agree that the referenced colour is red (Tye, 2018). Similarly, different  
605 speakers may have differing subjective experiences of hearing their own voice during vocalisation. The  
606 proposal is that the subjective experience of hearing own voice during vocalisation differs in a principled  
607 and consistent manner between people who do and do not stutter.

608 This subjective experience, or quale, of own voice during vocalisation will henceforth be referred to as  
609 “reflexivity”. It is related to self-awareness (Gallagher & Zahavi, 2021; Smith, 2020). The exact proposal is  
610 that reflexivity is increased for PWS relative to controls. What is meant by increased reflexivity is that the  
611 phenomenal experience of own voice is more intense for PWS than for ordinarily fluent speakers. It is as  
612 if PWS were speaking through a magical megaphone, which broadcasts only inside the body, and whose  
613 effect is to increase salience of the message being delivered rather than volume of the utterance.

614 Empirical investigation of qualia is achievable through psychophysics, albeit with well-identified  
615 difficulties (Fodor, 1987). The proposal of reflexivity as a quale builds on the Concurrency Hypothesis  
616 described in section 2, and in particular it follows from the issues around evolution, cognitive science and  
617 philosophy of mind discussed in section 2.3.2.1. The hypothesis of Communicative Mismatch, to be  
618 introduced in section 3.3.1.2, proposes that a difference in subjective experience of the reflexivity quale  
619 between people who do and do not stutter is causative of stuttering behaviour.

620 A difference in reflexivity between people who do and do not stutter could be expected to coincide with  
621 a difference in the auditory feedback whose presence is integral to many types of psycholinguistic and  
622 speech-motor models. Alterations to auditory feedback are well-established as reducing stuttering for  
623 PWS (Yates, 1963; Howell et al., 1987; Kalinowski et al., 1993; Stuart et al., 2004; Foundas et al., 2013),  
624 and hyperfunctional monitoring in stuttering has been proposed from psycholinguistic (Bernstein Ratner,  
625 1997; Bernstein Ratner & Wijnen, 2007) and speech-motor (Arenas, 2017) perspectives. REMATCH is  
626 independent of any particular speech-motor or psycholinguistic model. For example, speech may be  
627 entirely under feed forward control, or else speech may be best described by paradigms which do away  
628 with mental representation entirely (e.g. certain types of dynamical system, or those of extended  
629 cognition). For readers who prefer to think in terms of feedback control, the idea would be that an entire  
630 person (including the history, personality, hopes, dreams, and so forth) is included in the feedback loop  
631 for own voice audition. See Mysak (1969, ch 7) for a systems control account of stuttering along these  
632 lines.

### 633 *3.3.3 Communicative Mismatch*

634 When PWS describe moments of stuttering, the role of the audience and situation are among themes  
635 identified (Tichenor & Yaruss, 2018). In a review of linguistic factors, Karniol (1995) suggests that the  
636 involvement of motor process in stuttering is a symptom rather than a cause. Pierre (2015), extending  
637 beyond linguistics to discuss societal convention more broadly, describes stuttered speech as  
638 marginalised relative to dominant choreographies of bodily and inter-bodily communicative practices.

639 To address perspectives such as these, stuttering will be considered not just as an interruption of speech,  
640 but moreover as an interruption of a speech act (i.e. speech act as per Austin, 1955). It will be based  
641 around the approach-avoidance conflict hypothesis of stuttering developed by Sheehan (1953, 1958,  
642 1970, 1975). Approach-avoidance conflict was originally formulated as a Gestalt field theory by Lewin  
643 (1935). Conflict would follow incompatible goals – for example, accept a substantial pay rise (approach  
644 gradient), but only with unpaid weekend work at the employer’s discretion (avoidance gradient).  
645 Sheehan (1958) proposed that stuttering is a double approach-avoidance conflict, in which “[The person  
646 who stutters] can speak, thus achieving his aim of communication, but at the cost of the shame and guilt  
647 he has learned to attach to his stuttering. Or he can remain silent, abandon communication, and suffer  
648 the frustration and guilt that such a retreat carries with it.”

649 Sheehan was inspired by the work of Miller (1944) who trained rats in a runway first with a food goal,  
650 then with electric shock. When Miller presented the previously trained rats with a combination of a food  
651 goal and electric shock, the rats would display motor control vacillations similar to those observed in  
652 stuttering. In an earlier proposal along similar lines, Wyneken (1868; translated in Van Riper, 1982 p281)  
653 describes the will to speak during stuttering as “partially paralysed by doubt ... and one which is directly  
654 opposed to the will proper”. Wyneken goes on to liken stuttering to “...when somebody, for example,  
655 wants to venture a jump, but in the very moment in which he leaps doubts that he will succeed. Often he  
656 can no longer stop the leap, but also does not jump with sufficient assurance, and so does not reach his  
657 goal.”

658 The approach-avoidance proposal is updated in several ways. Firstly, the core hypothesis of increased  
659 reflexivity for PWS corresponds to own speech having increased salience when interpreted through the  
660 auditory system. Secondly, it is proposed that the unconscious interpretation of own speech operates  
661 with the high degree of automaticity proposed for unconscious processes in dual process theory (e.g. as  
662 per Evans, 2007; Kahneman, 2011). The double approach-avoidance conflict proposed by Sheehan is thus  
663 fragmented between unconscious and conscious processes. The final proposal is that stuttering occurs at  
664 times when there is uncertainty about the message being delivered. The uncertainty might, for example,  
665 relate to message content (e.g. whether the message being conveyed is accurate) or to message  
666 appropriateness (e.g. whether the message should be delivered to a particular audience, or at a  
667 particular time). The uncertainty could also be learned (e.g. from previous experience with stuttering –  
668 this would account for the difficulty many who stutter have in saying their own name).

669 Putting all of these components together, the overall proposal is that whenever the speaker  
670 unconsciously interprets own speech with uncertainty, nerve signals are created which block the ongoing  
671 speech act. At the same time, the speaker notices difficulty and consciously generates nerve signals  
672 intended to continue the speech act. Articulatory muscles respond to both conscious and unconscious  
673 processes, and so simultaneously receive innervation which is consistent with completion and cessation  
674 of an utterance. The resultant activity is behaviourally observable as stuttering. Figure 7 summarises the  
675 activity diagrammatically.

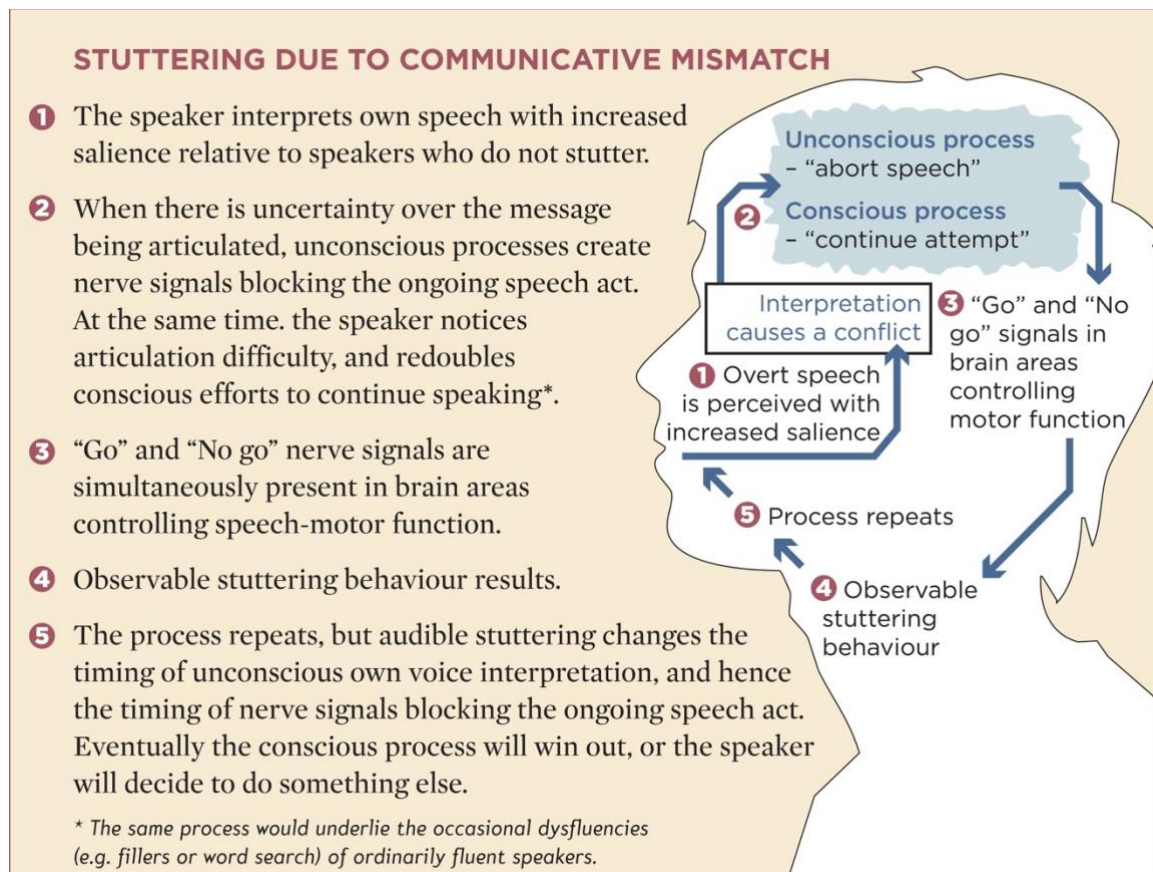

676

677 **Figure 7: Stuttering due to communicative mismatch. This is based on the approach-avoidance conflict**  
 678 **model of stuttering developed by Sheehan (1953, 1958, 1970, 1975), but updated to reflect**  
 679 **contemporary understanding of unconscious processes.**

680

681 © Creative Commons 4.0 licence.

682

683 From a psycholinguistic perspective, REMATCH places stuttering at the semantic-pragmatic interface. In  
 684 Levelt’s model (figure 6) stuttering would occur within the Conceptualiser. This differs from the  
 685 psycholinguistic models in section 3.2.3.1, which place stuttering in the Formulator (or, for EXPLAN,  
 686 between the the Formulator and Articulator). Section 3.4.1.2 will discuss a way to reconcile such  
 687 psycholinguistic models within REMATCH.

### 688 3.4 Explanatory Power

#### 689 3.4.1 Biological considerations

##### 690 3.4.1.1 Neurological substrate

691 Systematic review of grey matter structural neuroimaging in adults who stutter (AWS) shows increased  
 692 volume in the right superior temporal cortex and right precentral cortex compared to control groups of  
 693 ordinarily fluent speakers (Etchell et al., 2017; see review for finer granularity and additional areas).  
 694 These are homologues of areas in the left hemisphere thought to be important for speech and language  
 695 (Hickok & Poeppel, 2007). Activation likelihood estimation (ALE) meta-analysis of diffusor tensor imaging  
 696 shows AWS have reduced fractional anisotropy in the callosal body, and in dorsal white matter tracts  
 697 connecting grey matter regions considered important for auditory and motor function (Neef et al., 2015;  
 698 see review for finer granularity and additional areas). Possible interpretations of reduced FA include  
 699 demyelination, larger axon diameter, lower packing density or increased axonal membrane permeability

## Weak vestibular response in persistent developmental stuttering and implications for own voice identification

700 (Jones et al., 2013). Fractional anisotropy does not detail direction of information flow between grey  
701 matter areas.

702 ALE meta-analyses of functional neuroimaging in AWS during speech tasks show overactivation in areas  
703 corresponding to motor activity and underactivation in areas corresponding to auditory activity (Budde et  
704 al., 2014; Belyk et al., 2015; see state/trait comparisons in these meta-analyses for additional areas and  
705 finer granularity). Cerebellar vermis in AWS is underactive compared to controls, but overactive during  
706 stuttering. Neuroimaging of children who stutter shows differences from controls in several of the areas  
707 identified for adults who stutter (see, for example, Garnett et al., 2018; Kronfeld-Duenias et al., 2018;  
708 Koenraads et al. 2020), suggesting that the neurodevelopmental trajectory for stuttering diverges from  
709 that of ordinarily fluent speakers close to stuttering onset.

710 The core hypotheses of reflexivity and communicative mismatch will be traced through the brain areas  
711 just described. The route followed will describe a chronological sequence from audition of own voice,  
712 through cortical activity consistent with an ongoing speech act, to the creation of observable stuttering  
713 via speech-motor activity. References are as per the review articles already cited (Etchell et al., 2017,  
714 Neef et al., 2015, Belyk et al., 2015 and Budde et al., 2014) with further references introduced as  
715 necessary.

716 According to the Concurrency Hypothesis (section 2), own voice will be identified through coincidence  
717 detection between cochlear and vestibular afferents. Only two studies have assessed the vestibular  
718 system in PWS. Langová et al. (1975) found that horizontal nystagmus evoked during speech is more  
719 pronounced in PWS than in controls using rotary chair testing. Gattie et al. (submitted) found the  
720 vestibular-evoked myogenic potential, an indirect functional test of the vestibular brainstem and  
721 periphery, is smaller in PWS than in controls. The suggestion is of divergence in central vestibular  
722 function, and/or the nature of conduction along the VIII cranial nerve, between PWS and controls.  
723 Interpreted according to the Concurrency Hypothesis (section 2.3.2), a smaller vestibular input to the  
724 auditory brainstem would correspond to a lower likelihood for coincidence detection in cells whose  
725 excitation depends upon summation of synaptic input from multiple fibres (e.g. octopus cells in the  
726 cochlear nucleus, or principal cells of the medial superior olivary complex; Golding & Oertel, 2012). It  
727 follows that the ascending auditory stream at later stages of the ascending auditory pathway, or in  
728 temporal cortex, will be more weakly identified as an own voice stream in PWS than in controls. Inputs to  
729 cerebellar vermis will also be reduced during vocalisation for PWS (i.e. as per figure 3).

730 The sum of activity so far (smaller vestibular input to afferent streams of neural activity through the  
731 cerebellum and auditory brainstem) would more weakly identify own voice in PWS than in ordinarily  
732 fluent speakers. This occurs because the coincidence detection proposed by the Concurrency Hypothesis  
733 will be weaker with a smaller vestibular input. The weaker identification of own voice would in turn  
734 correspond to the increased reflexivity hypothesised for PWS. It is almost as if own voice is interpreted as  
735 for the voice of another speaker. From a systems control perspective (e.g. as per Jones et al., 2016), this  
736 would be referred to as inadequate sensory gating of the own voice auditory stream.

737 In the cerebrum, afferent own voice streams mediated via auditory brainstem and cerebellum could alter  
738 function in two brain areas which have repeatedly been identified as important in stuttering research.  
739 One of these is the cortico-basal ganglia-thalamo-cortical loop (Milardi et al., 2019), which is reviewed  
740 specifically in relation to stuttering by Chang & Guenther (this issue). The other area is temporal cortex,  
741 and in particular the temporo-parietal junction. Recall in this regard the discussion of section 2.4.1, that



742 an own voice auditory stream would provide a target for the proposed efference copy of the speech plan  
743 in predictive feedback control models. Several authors have proposed that a difference in such  
744 moderation, or in auditory-motor mapping, between PWS and controls underlies the observed stuttering  
745 behaviour (Max et al., 2004; Brown et al., 2005; Hickok et al., 2011; Cai et al., 2012). The proposals have  
746 received little support in direct tests (e.g. Beal et al., 2010; Liotti et al., 2010). However, tests have used  
747 vocalisation versus AC playback protocols. As described in section 2.4.1, vocalisation versus AC playback  
748 protocols do not use a physiologically valid own voice stimulus in the playback condition, and as such do  
749 not evaluate speech-induced suppression. Accordingly, the proposal that moderation of temporal cortex  
750 by speech-motor activity differs between PWS and controls remains live. It is one of the possibilities for  
751 the hypotheses of concurrency and reflexivity when applied to stuttering via a predictive feedback  
752 control model. Investigation of the temporo-parietal junction is of particular interest, because it has  
753 repeatedly been identified as important for self-other distinction (Steinbels, 2016), and contains an area  
754 in the Sylvian fissure hypothesised as important for language control (Hickok, 2017). The role of the  
755 cerebellum may also be crucial. The cerebellum is repeatedly found to have involvement in speech  
756 perception (meta-analysis in Skipper & Lametti, 2021). This includes high level tasks involving semantics,  
757 grammar, and comprehension (Ackermann & Brendel, 2016; Mariën & Manto, 2015).

758 The hypothesis of communicative mismatch is based on approach-avoidance conflict (Sheehan 1953;  
759 1958; 1970; 1975), which contemporary research (review in Aupperle & Paulus, 2010; Barker et al., 2019)  
760 places in the insula, amygdala, prefrontal cortex and the basal ganglia. All of these areas have been  
761 identified as showing a difference between PWS and controls in neuroimaging research (Yang et al.,  
762 2017; Toyomura et al., 2018; Budde et al., 2014; Etchell et al., 2017; see Garcia-Barrera & Davidow, 2015,  
763 for discussion of connection between prefrontal and anterior cingulate cortex in error monitoring). The  
764 basal ganglia in particular are crucial to the hypothesis of communicative mismatch. This is because  
765 conflict between selection and inhibition of competing actions, sometimes termed as “Go” and “No Go”  
766 (Mink, 1996; Bahuguna et al., 2015; Dunovan et al., 2015; Mink, 2018), could create involuntary muscular  
767 activity similar to that observed in stuttering. Thus, following the sequence described in this section from  
768 audition to articulation, basal ganglia activity would be the most proximal cause of observable stuttering  
769 behaviour (see Arenas, 2017, for a proposal emphasising functional importance of the subthalamic  
770 nucleus). Frontal and parietal cortex associated with speech-motor control would show state and trait  
771 differences in stuttering due their involvement in basal ganglia pathways (Albin et al., 1989; DeLong et al.,  
772 1990; Calabresi et al., 2014), and also due to white matter connection to temporal cortex important for  
773 auditory-motor integration (e.g. the efference copy proposed in speech-motor models), including  
774 commissural connection to homologues. The basal ganglia and cerebellum are interconnected via the  
775 thalamus (Hoshi et al., 2005; Bostan et al., 2010, Pelzer et al., 2017; Caligiore et al., 2017; Cacciola et al.,  
776 2017; Bostan & Strick, 2018) and are both proposed to have involvement in language processing and  
777 vocal learning (Booth et al., 2007; Pidoux et al., 2018). This underscores the prospective importance of  
778 the vestibular-cerebellar pathway (figure 3) for own voice identification in stuttering, and of cerebellar  
779 input to the cortico-basal ganglia-thalamo-cortical loop in stuttering (Chang & Guenther, this issue).  
780 Dopamine levels in the basal ganglia affect action selection (Mink, 1996; Reynolds et al., 2001; Haber,  
781 2014; Schultz, 2016), with differences in the dopamine system between PWS and controls found using  
782 positron electron tomography (Wu et al., 1997) and through pharmaceutical intervention (Maguire et al.,  
783 this issue). The basal ganglia have been repeatedly identified as important in stuttering research (Alm,  
784 2004; Metzger et al., 2017; Chang & Guenther, this issue).

#### 785 **3.4.1.2 Stuttering subtypes**

786 The neurological substrate described in the previous section encompasses almost the entire brain. This  
787 raises the possibility that preconditions for stuttering may require a difference from ordinarily fluent

## Weak vestibular response in persistent developmental stuttering and implications for own voice identification

788 speakers in the function of not just one brain area, but several (ie. as per Ludlow & Loucks, 2003). Such a  
789 view underlies multifactorial models of stuttering (e.g. Smith & Kelly, 1997; Starkweather, 2002; Walden  
790 et al., 2012; Smith & Weber, 2017), which examine the interplay between genetic, organismic and  
791 environmental contributing factors.

792 One way to develop such models would be through subtyping stuttering. If there are discrete groupings  
793 of factors which contribute to stuttering, separation into such groupings prior to data analysis could  
794 enable more granular investigation and facilitate hypothesis formulation. Unfortunately, subtyping  
795 stuttering is difficult (see review in Yairi, 2007; Seery et al., 2007), largely due to the challenges of  
796 longitudinal data collection.

797 Subtyping is proposed here, based on the four track system of Van Riper (1973; 1982 p94–108).  
798 Symptomatology is identical to that of Van Riper, but the account is extended with the proposal that  
799 causation differs between tracks. Track I is proposed to correspond to stuttering developing as an  
800 isolated diagnosis. Track II corresponds to stuttering co-developing with at least one other diagnosis.  
801 Tracks III and IV are trauma-based, and may be psychogenic or neurogenic.

802 Track I would have a genetic basis and be based around increased reflexivity. The genetic basis may  
803 affect several brain areas (i.e. as per Ludlow & Loucks, 2003). For example, genetic investigation of  
804 stuttering has suggested that the nature of white matter may be integral to stuttering behaviour –  
805 lysosomal pathways or glial cells are implicated (Han et al., 2019; Benito-Aragón et al. 2020). PWS have  
806 reduced fractional anisotropy in dorsal white matter tracts which connect cortical regions having speech-  
807 motor and auditory function (Neef et al., 2015; Etchell et al., 2017). It would appear that genetic  
808 variations in stuttering might be connected to the structure of these dorsal white matter tracts. If so, it is  
809 not clear why the white matter structural variation should be focal to just these dorsal tracts (Watkins &  
810 Büchel, 2010; Drayna, 2010). One possibility is that genetic variation affects several white matter tracts.  
811 It may, for example, also manifest as reduced fractional anisotropy in the vestibular portion of the VIII  
812 cranial nerve. If so, the variation would be consistent with the finding of a weaker vestibular response in  
813 PWS by Gattie et al. (submitted), and would support interpretation according to the concurrency and  
814 reflexivity hypotheses presented in the current article.

815 This suggestion around genetics is just one example of a long-term investigative target for stuttering  
816 research. Many other possibilities pertain – not only variations within the neurological substrate  
817 described for stuttering in section 3.4.1.1, but moreover the interplay between genetic, organismic and  
818 environmental factors described in multifactorial models of stuttering. Investigation of which factors are  
819 necessary and/or sufficient for behavioural stuttering to manifest is a topic for ongoing research.

820 From this perspective, track II stuttering is a particular version of track I in which one of the variations  
821 contributing to the co-occurring diagnosis also contributes to stuttering behaviour. The existence of track  
822 II stuttering would explain why stuttering co-occurs with other diagnoses at a rate higher than chance.  
823 Depending on the nature of co-occurring diagnoses (and accepting that co-occurring diagnoses will  
824 sometimes remain pending) existence of track II stuttering could also explain why testing groups of PWS  
825 sometimes results in a subtle difference from controls in abilities such as executive function, language,  
826 reaction time and general motor control. The explanation would be that a co-occurring diagnosis, rather  
827 than stuttering, is causative of the test result. Such a distinction has been established in studies which  
828 split the PWS group into those with and without a co-occurring diagnosis (e.g. Cullinan & Springer, 1980;  
829 Liebetrau & Daly, 1981; McKnight & Cullinan, 1987; Kobayashi & Hayasaka, 2003)

830 REMATCH places stuttering at the semantic-pragmatic interface, but is compatible with the  
831 psycholinguistic models introduced in section 3.2.3.1. Application of the psycholinguistic models will help  
832 to distinguish tracks I–IV. Stuttering in tracks I and II could be described by a combination of EXPLAN  
833 (Howell, 2004; 2008) and the Variable Release Threshold hypothesis (Brocklehurst et al., 2013). It is  
834 suggested here that the account is updated such that it is REMATCH, rather than the compatible but less  
835 detailed anticipatory struggle hypothesis of Bloodstein (1975), which provides detail of the release  
836 threshold.

837 Tracks III and IV stuttering are proposed as having a trauma-based origin which could be psychogenic or  
838 neurogenic. When the trauma results in heightened self-awareness (Gallagher & Zahavi, 2021; Smith,  
839 2020) increased attention to self-monitoring would follow. From the perspective of REMATCH the  
840 increased attention to self-monitoring would equate to increased reflexivity through a route other than  
841 the auditory system. Essentially, there is increased self-doubt about any speech act. In some cases the  
842 trauma could follow a profound emotional event (e.g. a bereavement or a family break-up), but it could  
843 also follow a more subtle series of events (Starkweather, 2002, lists possible environmental influencers  
844 on stuttering). Such stuttering could be described by the Vicious Circle Hypothesis (Vasić & Wijnen,  
845 2005), in which monitoring of phonological error becomes hyper-vigilant. This type of stuttering could  
846 alternatively be explained from the perspective of EXPLAN and the Variable Release Threshold  
847 hypothesis. It would correspond to a release threshold which varies similarly to that of an ordinarily  
848 fluent speaker, but which is continuously subject to a multiplier greater than unity.

849 Other instances of tracks III and IV could be primarily caused by neural insult (e.g. transient ischemic  
850 attack, traumatic brain injury or neurodegenerative disease). If the effect of the neural insult is to alter  
851 function of a brain area important for phonological formulation, this type of stuttering could be  
852 described by the Covert Repair Hypothesis. However, neurogenic stuttering will be the most difficult to  
853 model. If the diagnosis is of a progressive neurological condition, stuttering may be transient prior to  
854 being masked by a wider range of symptoms involving language, speech-motor or executive function. In  
855 neurogenic stuttering with no other symptoms, behaviour may differ from tracks I–II due to the  
856 alteration in brain function having a random structural cause (neural insult) rather than proceeding  
857 through a genetic, developmental or psychological route.

858 Tracks I–IV may show overlap. For example, a child may have a genetic disposition to stuttering (track I)  
859 and experience environmental conditions creating psychosocial pressure (track III). This notion underlies  
860 the Demands and Capacities model (Adams, 1990; Starkweather & Gottwald, 1990; Starkweather, 2002),  
861 which is frequently interpreted as a genetic predisposition to stuttering becoming concrete following  
862 environmental influence. However, the predisposition need not be genetic; combinations of any of tracks  
863 I–IV, and/or single track etiologies, could just as well result in stuttering behaviour.

864 Developmental stuttering could involve any of tracks I–IV. Whereas absence of a plausible genetic or  
865 developmental contributory mechanism to stuttering in adulthood seems to limit adult onset stuttering  
866 to tracks III and IV. Thus, the rarity of adult onset stuttering (Ward, 2006, ch 16) is consistent with Van  
867 Riper's (1973; 1982) finding that between 80–90% of his 300-strong caseload were tracks I or II. An  
868 exception would be adult onset where there is a history of childhood stuttering (Van Riper, 1982 p66). In  
869 such cases, reappearance may have psychogenic or neurogenic influence. For example, Shahed &  
870 Jankovic (2001) describe 12 persons who had stuttered in childhood but not as adults, and for whom  
871 stuttering reappeared following a diagnosis of Parkinson's disease.

### 872 **3.4.2 Other explananda**

873 The following sections address the explananda in tables 2 and 3, to which the reader might  
874 simultaneously refer.

#### 875 **3.4.2.1 Linguistic and Situational**

876 Variation in phonological formulation between stuttering subtypes was described in section 3.4.2.  
877 However, the main linguistic hypothesis within REMATCH is that own speech is interpreted in PWS with  
878 increased salience. Recall now the explananda in table 2. Unconscious processes are proposed to block  
879 an ongoing utterance whenever there is uncertainty about a speech act. Uncertainty is proposed to  
880 increase with propositionality, and hence stuttering will correlate with propositionality. Without an  
881 audience, a speech act cannot be performed. This explains why, unless PWS project an audience,  
882 stuttering will not occur when alone (Langová & Sváb, 1973). With authority listeners, even ordinarily  
883 fluent speakers experience increased salience when executing a speech act. For PWS, increased salience  
884 due to the authority listener combines with increased salience due to reflexivity, increasing the  
885 propensity for stuttering according to REMATCH.

886 These proposals are consistent with the observation of Sheehan (1958) that speech breakdown in  
887 stuttering coincides with the requirement “to say something important to someone important”. The  
888 proposals could be tested by following theoretical frameworks for pragmatics and social convention (e.g.  
889 Grice, 1957, 1989; Rescorla, 2019). For example, the exact loci of stuttered instances could be a project in  
890 experimental pragmatics (Noveck & Sperber, 2004; Meibauer & Steinbach, 2011; Noveck, 2018). Such a  
891 project might initially appear circular (stuttered phonemes are predefined as those with high  
892 propositionality). However, corpora of stuttered speech provide rich data, and can therefore be  
893 investigated following themes in pragmatics (e.g. Gricean implicatures, epistemic vigilance) using  
894 statistical techniques such as latent class or principal components analysis. Such an approach could also  
895 appraise changes in language use with development (e.g. within people who stutter there is a tendency  
896 for children to stutter on function words, and adults to stutter on content words). See also Eisenson &  
897 Horowitz (1945), Sheehan et al. (1967), Gould & Sheehan (1967) and MacKay (1969) for examples of  
898 work which could fit within a research programme for experimental pragmatics in stuttering.

#### 899 **3.4.2.2 Anticipation, Consistency and Adjacency**

900 Speakers can unconsciously scan ahead. This applies to spontaneous speech or when reading aloud. If  
901 message content scanned ahead is interpreted by the speaker according to REMATCH, the person who  
902 stutters will be able to predict when speech difficulty is imminent. In oral readings, uncertainty around  
903 any particular word is unchanged on repeated readings, because the underlying message has not  
904 changed. Therefore, stuttering has the same loci on repeat readings. When words are blotted out, the  
905 reader unconsciously anticipates what the word would have been (or infers intended meaning from the  
906 words remaining) leading to stuttering on the word that is unconsciously predicted to convey intended  
907 meaning to a listener. This will usually be an adjacent word to the word previously stuttered.

#### 908 **3.4.2.3 Adaptation**

909 Propositionality is reduced on repeat readings, since the listener is already aware of the message being  
910 delivered, and the speaker is aware of the message as well. Reduced propositionality in turn reduces  
911 salience. According to REMATCH, reduced salience will reduce the tendency for the speaker to  
912 unconsciously block an ongoing speech act. Essentially, reduced propositionality acts as a counter for the  
913 increased reflexivity proposed in PWS.

#### 914 **3.4.2.4 Operant Conditioning**

915 Speech-motor or psycholinguistic breakdown accounts of stuttering appeal to emotional or psychosocial  
916 stress to explain situational variation. A problem for such accounts is that they predict that stress should  
917 be very high in laboratory conditions with response-contingent stimulation (e.g. electric shock or time  
918 out upon stuttering), and therefore stuttering should increase. However, the converse is found:  
919 stuttering decreases with response-contingent stimulation.

920 The finding can be explained by REMATCH as response-contingent stimulation forcing an attentional shift  
921 in the speaker. The attentional shift is towards an increased conscious control of speech. This shift  
922 diminishes the influence of unconscious processing of speech, which according to REMATCH (figure 7)  
923 will reduce the amount of stuttering. Increasing conscious control is sufficiently effortful that unless an  
924 operant speaking technique such as fluency shaping has been learnt, PWS will not increase conscious  
925 control volitionally (see Constantino et al., 2020, for extended discussion). However, the continuous  
926 presence of response-contingent stimulation in laboratory conditions makes increased conscious control  
927 of speech unavoidable for the speaker.

#### 928 **3.4.2.5 Alterations to audition during speech**

929 Alterations to audition during speech will affect own voice identification according to the Concurrency  
930 Hypothesis (section 2). Alterations which are effective are proposed to reduce reflexivity, and thereby to  
931 reduce stuttering according to REMATCH. The exact detail of audition changes effective for reducing  
932 stuttering is a topic for ongoing research. Timings in table 1 show a starting point. The effectiveness of  
933 long delays (e.g. 50 ms or more) may have more to do with phoneme or syllable recognition, or word  
934 recognition, than with own voice identification. If so, effectiveness of particular delay lengths will be  
935 variable, because the duration of word-initial phonemes is variable. The prediction from the Concurrency  
936 Hypothesis is that alterations on the time scale of a millisecond or less will be most effective. Such rapid  
937 alterations have not been tested other than by Howell et al. (1987), who showed that frequency shifts  
938 with a delay on the order of one millisecond were more effective at reducing stuttering than delays of 50  
939 ms. Alterations most effective for reducing stuttering may depend on individual physiologies. If so, there  
940 is a prospect for tailoring the delay to individuals depending on EEG measurements. Such a project would  
941 be a part of, or be informed by, the investigation of own voice identification outlined in section 2.

942 In alterations to audition involving a second speaker (shadowing or unison speaking) there is an  
943 additional benefit in that propositionality is also reduced (the second speaker is already aware of the  
944 message being delivered, and is encouraging delivery of that message). For this reason, unison speaking  
945 is the most effective way of reducing stuttering.

#### 946 **3.4.2.6 Therapy effectiveness**

947 REMATCH identifies the proximal cause of core stuttering behaviour as simultaneous “Go” and “No Go”  
948 signals in brain areas coordinating articulatory muscles, as described in section 3.4.1.1. Accessory and  
949 interiorised stuttering behaviours are explained in this regard as attempts by the speaker to resolve core  
950 stuttering behaviours (i.e. explanation as per Van Riper, 1982, ch 6–7).

951 Early stages of many stuttering therapies (e.g. the motivation, identification and desensitisation stages  
952 described by Van Riper, 1973) include psychological therapy, helping speakers to unlearn accessory and  
953 interiorised stuttering behaviours which have become engrained through habit. These early stages of  
954 stuttering therapy increase approach and decrease avoidance behaviours. For example, desensitisation  
955 therapy reduces emotionality attached to speaking situations. It is proposed that reduced emotionality  
956 will decrease the tendency to unconsciously block an ongoing speech act, and increase willingness to  
957 speak. The effect would be to reduce reflexivity, and thereby decrease stuttering according to REMATCH.

958 Speech work in therapies (e.g. the variation and adaptation stages in Van Riper, 1973) deliberately  
959 introduces prolongation to the beginning of syllables. Prolongation acts similarly to an alteration to  
960 audition during speech, and thereby reduces stuttering as described in section 3.4.2.5. An alternative  
961 strategy having the same effect would be to deliberately introduce repetition (Johnson, 1961). However,  
962 deliberate repetition is seldom used, perhaps because it is more noticeable than prolongation.

963 A major distinction between therapies is whether prolongation is on every syllable (fluency shaping) or  
964 only on syllables where stuttering is anticipated (block modification). See discussion in Ingham (1984,  
965 p328) or Gregory (1979). Prolongation on every syllable entails a continued attentional shift whilst  
966 talking. According to REMATCH, continued attentional shift will reduce stuttering (see section 3.4.2.4).  
967 Thus, fluency shaping has two methods reducing the amount of stuttering: syllable initial prolongation,  
968 and attentional shift. This would explain why fluency shaping programmes are often more effective than  
969 block modification programmes in reducing the amount of stuttering. However, fluency shaping  
970 programmes are effortful for the speaker (Constantino, 2020) and for this reason many PWS will prefer a  
971 block modification approach.

### 972 **3.5 Discussion of the REMATCH hypothesis**

973 The REMATCH hypothesis draws together breakdown and anticipatory struggle hypotheses of stuttering.  
974 In this sense, it is similar to, and compatible with, the Variable Release Threshold hypothesis of  
975 Brocklehurst et al. (2013). REMATCH goes into additional detail by specifying that the type of anticipatory  
976 struggle is an updated version of the approach-avoidance conflict proposed by Sheehan (1953; 1958;  
977 1970; 1975). This update situates REMATCH in what Levelt (1989, 1999) refers to as the Conceptualiser.  
978 Thus, REMATCH is fundamentally different from (although compatible with) hypotheses which explain  
979 stuttering as breakdown in what Levelt refers to as the Formulator and/or Articulator. From this  
980 perspective, a major contribution of REMATCH is to provide a framework through which psycholinguistic  
981 and situational variation in stuttering can be investigated.

982 The updated approach-avoidance conflict in REMATCH is explained through a view of the unconscious  
983 proposed to be similar to that in dual process theory (e.g. as per Evans, 2007; Kahneman, 2011), and  
984 containing a high degree of automaticity. This provides a basis for investigation using cognitive science  
985 methodologies (e.g. as per the experimental pragmatics of Noveck & Sperber, 2004). The unconscious  
986 process in REMATCH could just as well have been explained as an update of repressed needs hypotheses  
987 of stuttering, in which the view of the unconscious is no longer necessarily that of psychoanalytic theory.  
988 This is possible because REMATCH contains a description of the moment of stuttering (figure 7) which  
989 can be compared to and informed by first person accounts. Thus, REMATCH promotes integration of  
990 qualitative and quantitative work in stuttering, and can furthermore provide a link to phenomenological  
991 accounts of stuttering (e.g. Ellis, 2020; Isaacs, 2020). Such integrations could inform psychological  
992 therapies for stuttering. They could also help to promote a social model of stuttering (Campbell et al.,  
993 2019), even within a world where neuroscientific research will remain within a medical model. Efforts in  
994 this direction are important if stuttering research is to be relevant to people who stutter.

## 995 **4. General discussion**

996 This article has described hypotheses of own voice identification and stuttering. The account has been  
997 highly detailed and with very broad scope because, as described in section 1, all of the hypotheses are  
998 proposed together as a best explanation argument. As such, it is necessary to show that the combined  
999 explanation has a high degree of explanatory power and parsimony.

This version 29 June, 2021

1000 The crux of this article is the Concurrency Hypothesis that own voice is identified through coincidence  
1001 detection between the neural firing rates arising from deflection of cochlear and vestibular  
1002 mechanoreceptors by the sound and vibration generated during vocalisation. Section 2 describes how  
1003 the Concurrency Hypothesis provides a principled basis for self-environment distinction, with importance  
1004 for considerations in cognitive science and philosophy of mind. The Concurrency Hypothesis was also  
1005 applied to speech-motor research, in which it highlighted limitations in empirical support for the  
1006 proposal that speech-motor activity modulates activity in temporal cortex. Finally, the Concurrency  
1007 Hypothesis was applied to auditory scene analysis, in which it is proposed to provide the basis for a  
1008 system of discrimination in multi-talker scenarios.

1009 In section 3, the Concurrency Hypothesis was developed into an explanation of stuttering. The initial step  
1010 was to propose a quale, reflexivity. This refers to the phenomenology of hearing one's own voice, and is  
1011 proposed to differ between people who do and do not stutter. The account was then developed into an  
1012 update of the approach-avoidance conflict model of stuttering (Sheehan 1953; 1958; 1970; 1975),  
1013 referred to as REMATCH. This explains the moment of stuttering as a communicative mismatch. The  
1014 speaker experiences own voice with increased salience, but this creates a mismatch whenever there is  
1015 uncertainty about the ongoing message. In such cases, unconscious processes reinterpreting the message  
1016 create nerve signals blocking the ongoing speech act, at the same time the speaker is consciously trying  
1017 to continue. The resultant conflict is behaviourally observable as stuttering.

1018 The Concurrency Hypothesis and REMATCH are core hypotheses. Many auxiliary hypotheses were  
1019 introduced, mainly within the account of stuttering. These include the neurological substrate for  
1020 stuttering, a proposal for subtyping stuttering, and a variety of process and contrastive explanations of  
1021 data from stuttering research. These auxiliary hypotheses are likely to change with time, and are  
1022 provided here as a snapshot so that the scope of the intended explanation of stuttering is apparent.

1023 The Concurrency Hypothesis could be applied groups other than people who stutter, and who are  
1024 expected to show differences from controls in own voice identification. Some examples of such groups  
1025 include those experiencing auditory and/or vestibular neuropathy (Kaga, 2016) and those experiencing  
1026 auditory hallucination (e.g. in schizophrenia – McLachlan, Phillips, Rossell & Wilson, 2013; Matthews et  
1027 al., 2013; Weintraub et al., 2012; Waters & Fernyhough, 2019).

1028 Testable predictions generated by the hypotheses in this article are described in sections 2 and 3. One of  
1029 these predictions is that people who stutter should show a difference from controls in tests of the  
1030 vestibular system. This was appraised by Gattie et al (submitted) with the finding that vestibular  
1031 response is weaker in people who stutter than in paired controls. The result is consistent with the only  
1032 prior research on the vestibular system in people who stutter (Langová et al., 1975) and supports the  
1033 hypotheses presented in this article.

## 1034 5. Conclusion

1035 The major recommendation from this article is that researchers should use physiologically valid stimuli  
1036 when investigating own voice in speech and language research. Using stimulation over air conduction  
1037 only, even with a sound pressure level increase to perceptually match the loudness experienced during  
1038 vocalisation, does not generate physiologically valid stimuli. Instead, stimuli should consist of a  
1039 combination of air conducted sound and body conducted vibration which is binaurally symmetric, and  
1040 has coincident arrival at both inner ears.

1041 **Conflict of Interest**

1042 The authors declare that the research was conducted in the absence of any commercial or financial  
1043 relationships that could be construed as a potential conflict of interest.

1044 **Author Contributions**

1045 Conceptualization: ideas; formulation of the overarching research goals and aims  
1046 MG

1047 Methodology: development or design of methodology or creation of models  
1048 MG

1049 Software: programming; software development; designing computer programs; implementation of  
1050 computer code or algorithms; testing code components  
1051 MG

1052 Validation: verification of the replication and reproducibility of results, experiments, or other research  
1053 outputs  
1054 MG

1055 Formal analysis: application of statistical, mathematical, computational, or other techniques to analyse or  
1056 synthesise data  
1057 MG

1058 Investigation: conducting the research and investigation process, specifically performing the experiments  
1059 or data collection  
1060 MG

1061 Resources: provision of study materials, materials, instrumentation, computing resources, or analysis  
1062 tools  
1063 MG

1064 Data curation: annotation, scrubbing, or maintenance of research data (including software code, where it  
1065 is necessary for interpreting the data itself)  
1066 MG

1067 Writing—original draft: preparation, creation and/or presentation of the published work, specifically  
1068 writing the initial draft  
1069 MG

1070 Writing—review & editing: critical review, commentary, or revision  
1071 MG, KK, EL

1072 Visualization: preparation, creation and/or presentation of the published work, specifically data  
1073 presentation or visualisation  
1074 MG

1075 Supervision: oversight and leadership responsibilities, including mentorship  
1076 KK, EL



1077 Project administration: coordination of the research activity planning and execution

1078 MG, KK, EL

1079 Funding acquisition: acquisition of financial support

1080 MG, KK

## 1081 Funding

1082 This work was supported by a UK Economic and Social Research Council (ESRC) Collaborative Award in  
1083 Science and Engineering (CASE) to Max Gattie. The CASE partner was Interacoustics A/S, Middelfart,  
1084 Denmark. Karolina Kluk was supported by NIHR Manchester Biomedical Research Centre.

## 1085 Acknowledgments

1086 Thanks to Paul Brocklehurst for comments on this article. Any shortcomings in the finished article are  
1087 solely the responsibility of the named authors.

## 1088 References

- 1089 Abdalla, S. (2011). Low Frequency Dielectric Properties of Human Blood. *IEEE Transactions on*  
1090 *NanoBioscience*, 10(2), 113–120. <http://doi.org/10.1109/TNB.2011.2159734>
- 1091 Acheson, D. J., & Hagoort, P. (2014). Twisting tongues to test for conflict-monitoring in speech  
1092 production. *Frontiers in Human Neuroscience*, 8, 206. <http://doi.org/10.3389/fnhum.2014.00206>
- 1093 Ackermann, H., & Brendel, B. (2016). Cerebellar contributionsto speech and language. In G. Hickok & S. L.  
1094 Small (Eds.), *Neurobiology of language*(pp. 73–84). Academic Press. [https://doi.org/10.1016/B978-0-](https://doi.org/10.1016/B978-0-12-407794-2.00007-9)  
1095 [12-407794-2.00007-9](https://doi.org/10.1016/B978-0-12-407794-2.00007-9)
- 1096 Adams, J. C. (1997). Projections from octopus cells of the posteroventral cochlear nucleus to the ventral  
1097 nucleus of the lateral lemniscus in cat and human. *Aud. Neurosci.* 3, 335–350.
- 1098 Adams, M. R. (1990). The Demands and Capacities Model I: theoretical elaborations. *Journal of Fluency*  
1099 *Disorders*, 15, 136–141.
- 1100 Agmon-Snir, H., Carr, C. E., & Rinzel, J. (1998). The role of dendrites in auditory coincidence detection.  
1101 *Nature*, 393(6682), 268–272. <http://doi.org/10.1038/30505>
- 1102 Ajdacic-Gross, V., Vetter, S., Müller, M., Kawohl, W., Frey, F., Lupi, G., et al. (2010). Risk factors for  
1103 stuttering: a secondary analysis of a large data base. *European Archives of Psychiatry and Clinical*  
1104 *Neuroscience*, 260(4), 279–286. <http://doi.org/10.1007/s00406-009-0075-4>
- 1105 Ajdacic-Gross, V., Bechtiger, L., Rodgers, S., Müller, M., Kawohl, W., Känel, von, R., et al. (2018). Subtypes  
1106 of stuttering determined by latent class analysis in two Swiss epidemiological surveys. *Plos One*, 13(8),  
1107 e0198450. <http://doi.org/10.1371/journal.pone.0198450>
- 1108 Alexander, G.E., Newman, J.D. and Symmes, D. (1976), Convergence of prefrontal and acoustic inputs  
1109 upon neurons in the superior temporal gyrus of the awake squirrel monkey. *Brain Res.*, 116 334–338.
- 1110 Alm, P. A. (2004). Stuttering and the basal ganglia circuits: a critical review of possible relations. *Journal*  
1111 *of Communication Disorders*, 37(4), 325–369. <http://doi.org/10.1016/j.jcomdis.2004.03.001>
- 1112 Albin, R.L., Young, A.B. & Penney, J.B. (1989). The functional anatomy of basal ganglia disorders. *Trends*  
1113 *Neurosci.* 12, 366–375.
- 1114 Ambrose, N. G., Cox, N. J., & Yairi, E. (1997). The genetic basis of persistence and recovery in stuttering.  
1115 *Journal of Speech, Language, and Hearing Research : JSLHR*, 40(3), 567–580.  
1116 <http://doi.org/10.1044/jslhr.4003.567>
- 1117 Andrews G. & Harris M. (1964) *The Syndrome of Stuttering*. London, UK: Spastics Society Medical  
1118 Education and Information Unit in association with Heinemann Medical.
- 1119 Andrews, G., Craig, A., Feyer, A.-M., Hoddinott, S., Howie, P., & Neilson, M. (1983). Stuttering: A review of  
1120 research findings and theories circa 1982. *Journal of Speech and Hearing Disorders*, 48, 226-246.

- 1121 Arenas, R. M. (2017). Conceptualizing and investigating the contextual variability of stuttering: The  
1122 speech and monitoring interaction (SAMI) framework. *Speech, Language and Hearing, 20*(1), 15–28.  
1123 <http://doi.org/10.1080/2050571X.2016.1221877>
- 1124 Arend, J. M., Stade, P., & Pörschmann, C. (2017). Binaural reproduction of self-generated sound in virtual  
1125 acoustic environments (pp. 015007–15). Presented at the 173rd Meeting of Acoustical Society of  
1126 America and 8th Forum Acusticum, Acoustical Society of America. <http://doi.org/10.1121/2.0000574>
- 1127 Arndt, J., & Healey, E. C. (2001). Concomitant disorders in school-age children who stutter. *Language,  
1128 Speech, and Hearing Services in Schools, 32*, 68–78.
- 1129 Ashida, G., & Carr, C. E. (2011). Sound localization: Jeffress and beyond. *Current Opinion in Neurobiology,  
1130 21*(5), 745–751. <http://doi.org/10.1016/j.conb.2011.05.008>
- 1131 Atencio, D. J., & Montero, I. (2009). Private speech and motivation: The role of language in a sociocultural  
1132 account of motivational processes. In A. Winsler, C. Fernyhough, & I. Montero (Eds.), *Private speech,  
1133 executive functioning, and the development of verbal self-regulation* (pp. 201–223). Cambridge, UK:  
1134 Cambridge University Press. <http://dx.doi.org/10.1017/CBO9780511581533.017>
- 1135 Aupperle, R. L., & Paulus, M. P. (2010). Neural systems underlying approach and avoidance in anxiety  
1136 disorders. *Dialogues in Clinical Neuroscience, 12*(4), 517–531.  
1137 <http://doi.org/10.31887/DCNS.2010.12.4/raupperle>
- 1138 Bahuguna, J., Aertsen, A., & Kumar, A. (2015). Existence and control of Go/No-Go decision transition  
1139 threshold in the striatum. *PLoS computational biology, 11*(4), e1004233.  
1140 <https://doi.org/10.1371/journal.pcbi.1004233>
- 1141 Bajo, V. M., & King, A. J. (2012). Cortical modulation of auditory processing in the midbrain. *Frontiers in  
1142 Neural Circuits, 6*, 114. <http://doi.org/10.3389/fncir.2012.00114>
- 1143 Barker, M., Solinski, H. J., Hashimoto, H., Tagoe, T., Pilati, N., & Hamann, M. (2012). Acoustic  
1144 overexposure increases the expression of VGLUT-2 mediated projections from the lateral vestibular  
1145 nucleus to the dorsal cochlear nucleus. *Plos One, 7*(5), e35955.  
1146 <http://doi.org/10.1371/journal.pone.0035955>
- 1147 Barker, T. V., Buzzell, G. A., & Fox, N. A. (2019). Approach, avoidance, and the detection of conflict in the  
1148 development of behavioral inhibition. *New Ideas in Psychology, 53*, 2–12.  
1149 <http://doi.org/10.1016/j.newideapsych.2018.07.001>
- 1150 Barber, V.B. (1939) Studies in the psychology of stuttering: XV. Chorus reading as a distraction in  
1151 stuttering. *Journal of Speech Disorders, 4*, 371–383.
- 1152 Barber, V.B. (1940) Studies in the psychology of stuttering: Rhythm as a distraction in stuttering. *Journal  
1153 of Speech Disorders, 5*, 29–42.
- 1154 Barr, D. J., Levy, R., Scheepers, C., & Tily, H. J. (2013). Random effects structure for confirmatory  
1155 hypothesis testing: Keep it maximal. *Journal of Memory and Language, 68*, 255–278.  
1156 <http://dx.doi.org/10.1016/j.jml.2012.11.001>
- 1157 Bates, D., & Maechler, M. (2009). lme4: Linear mixed-effects models using Eigen and  
1158 Eigen. *Journal of Statistical Software, 65*, 1–68.
- 1159 Baumgartner, J., & Duffy, J. R. (1997). Psychogenic stuttering in adults with and without neurologic  
1160 disease. *Journal of Medical Speech-Language Pathology, 5*(2), 75–95.
- 1161 Baxter, S., Johnson, M., Blank, L., Cantrell, A., Brumfitt, S., Enderby, P., & Goyder, E. (2015). The state of  
1162 the art in non-pharmacological interventions for developmental stuttering. Part 1: a systematic review  
1163 of effectiveness. *International Journal of Language & Communication Disorders, 50*(5), 676–718.  
1164 <http://doi.org/10.1111/1460-6984.12171>
- 1165 Beal, D. S., Cheyne, D. O., Gracco, V. L., Quraan, M. A., Taylor, M. J., & De Nil, L. F. (2010). Auditory  
1166 evoked fields to vocalization during passive listening and active generation in adults who stutter.  
1167 *NeuroImage, 52*(4), 1645–1653. <http://doi.org/10.1016/j.neuroimage.2010.04.277>
- 1168 Behroozmand, R., Shebek, R., Hansen, D. R., Oya, H., Robin, D. A., Howard, M. A., & Greenlee, J. D. W.  
1169 (2015). Sensory-motor networks involved in speech production and motor control: an fMRI study.  
1170 *NeuroImage, 109*(C), 418–428. <http://doi.org/10.1016/j.neuroimage.2015.01.040>
- 1171 Beiderbeck, B., Myoga, M. H., Müller, N. I. C., Callan, A. R., Friauf, E., Grothe, B., & Pecka, M. (2018).  
1172 Precisely timed inhibition facilitates action potential firing for spatial coding in the auditory brainstem.  
*Nature Communications, 9*(1), 1771–13. <http://doi.org/10.1038/s41467-018-04210-y>

- 1173 von Békésy, G. (1949). "The structure of the middle ear and the hearing of one's own voice by bone  
1174 conduction," J. Acoust. Soc. Am. 21, 217–232.
- 1175 Benito-Aragón, C., Gonzalez-Sarmiento, R., Liddell, T., Diez, I., d'Oleire Uquillas, F., Ortiz-Terán, L., et al.  
1176 (2020). Neurofilament-lysosomal genetic intersections in the cortical network of stuttering. *Progress*  
1177 *in Neurobiology*, 184, 101718. <http://doi.org/10.1016/j.pneurobio.2019.101718>
- 1178 Beving, H., Eriksson, L. E., Davey, C. L., & Kell, D. B. (1994). Dielectric properties of human blood and  
1179 erythrocytes at radio frequencies (0.2-10 MHz); dependence on cell volume fraction and medium  
1180 composition. *European Biophysics Journal : EBJ*, 23(3), 207–215.
- 1181 BinKhamis, G., A. Léger, S. L. Bell, G. Prendergast, M. O'Driscoll, and K. Kluk. 2019. "Speech Auditory  
1182 Brainstem Responses: Effects of Background, Stimulus Duration, Consonant–Vowel, and Number of  
1183 Epochs." *Ear and Hearing* 40(3): 659–670. doi:10.1097/AUD.0000000000000648.
- 1184 Blood, G. W., Ridenour, V. J., Jr, & Qualls, C. D. (2003). Co-occurring disorders in children who stutter.  
1185 *Journal of Communication Disorders*, 36, 427–448.
- 1186 Bloodstein, O. (1995) A Handbook on Stuttering (5th ed), Singular.
- 1187 Bloodstein, O. (2002). Early stuttering as a type of language difficulty. *Journal of Fluency Disorders*, 27(2),  
1188 163–6– quiz 166–7. [http://doi.org/10.1016/s0094-730x\(02\)00111-0](http://doi.org/10.1016/s0094-730x(02)00111-0)
- 1189 Bloodstein, O. (2006). Some empirical observations about early stuttering: a possible link to language  
1190 development. *Journal of Communication Disorders*, 39(3), 185–191.  
1191 <http://doi.org/10.1016/j.jcomdis.2005.11.007>
- 1192 Boulet, S. L., Boyle, C. A., & Schieve, L. A. (2009). Health care use and health and functional impact of  
1193 developmental disabilities among US children, 1997–2005. *Archives of Pediatrics & Adolescent*  
1194 *Medicine*, 163, 19–26.
- 1195 Booth JR, Wood L, Lu D, Houk JC, Bitan T (2007). The role of the basal ganglia and cerebellum in language  
1196 processing. *Brain Res.*;1133:136–44.
- 1197 Bregman, A. S. (1990) Auditory scene analysis. MIT Press: Cambridge, MA
- 1198 Briley, P.M. & Ellis, C. Jr (2018). The Coexistence of Disabling Conditions in Children Who Stutter:  
1199 Evidence From the National Health Interview Survey. *J Speech Lang Hear Res.*;61(12):2895-2905. doi:  
1200 10.1044/2018\_JSLHR-S-17-0378.
- 1201 British Society of Audiology (2012), Recommended Procedure: Cervical and Ocular Vestibular Evoked  
1202 Myogenic Potentials
- 1203 Brown, S., Ingham, R. J., Ingham, J. C., Laird, A. R., & Fox, P. T. (2005). Stuttered and fluent speech  
1204 production: An ALE meta-analysis of functional neuroimaging studies. *Human Brain Mapping*, 25(1),  
1205 105–117. <http://doi.org/10.1002/hbm.20140>
- 1206 Brown, T., Sambrooks, J. E., & MacCulloch, M. J. (1975). Auditory thresholds and the effect of reduced  
1207 auditory feedback of suttering. *Acta Psychiatrica Scandinavica*, 51(5), 297–311.  
1208 <http://doi.org/10.1111/j.1600-0447.1975.tb00009.x>
- 1209 Buchsbaum, B. R., Hickok, G., & Humphries, C. (2001). Role of left posterior superior temporal gyrus in  
1210 phonological processing for speech perception and production. *Cognitive Science*.
- 1211 Budde, K. S., Barron, D. S., & Fox, P. T. (2014). Stuttering, induced fluency, and natural fluency: a  
1212 hierarchical series of activation likelihood estimation meta-analyses. *Brain and Language*, 139, 99–  
1213 107. <http://doi.org/10.1016/j.bandl.2014.10.002>
- 1214 Brocklehurst, P. H., Lickley, R. J., & Corley, M. (2013). Revisiting Bloodstein's Anticipatory Struggle  
1215 Hypothesis from a psycholinguistic perspective: A Variable Release Threshold hypothesis of stuttering.  
1216 *Journal of Communication Disorders*, 46(3), 217–237. <http://doi.org/10.1016/j.jcomdis.2013.04.002>
- 1217 Bernstein Ratner, N. (1997). Stuttering: a psycholinguistic perspective. In: Curlee R, Siegel GM,  
1218 editors. *Nature and treatment of stuttering: New directions*. 2. Boston, MA: Allyn & Bacon. pp. 99–  
1219 127.
- 1220 Bernstein Ratner, N., & Wijnen, F. (2007). The Vicious Cycle: Linguistic Encoding, Self- Monitoring and  
1221 Stuttering. In *Research, Treatment and Self-help in Fluency Disorders – New Horizons: Proceedings of*  
1222 *the Fifth World Congress on Fluency Disorders* (pp. 84–90). The International Fluency Association.  
1223 ISBN-13 : 978-0955570018.
- 1224 Bostan A.C., Dum R.P., Strick P.L. (2010). The basal ganglia communicate with the cerebellum. *Proc Natl*  
1225 *Acad Sci U S A*. 2010 May 4;107(18):8452-6. doi: 10.1073/pnas.1000496107. PMID: 20404184; PMCID:  
1226 PMC2889518.

## Weak vestibular response in persistent developmental stuttering and implications for own voice identification

- 1227 Bostan, A. C., & Strick, P. L. (2018). The basal ganglia and the cerebellum: nodes in an integrated network.  
1228 *Nature reviews. Neuroscience*, 19(6), 338–350. <https://doi.org/10.1038/s41583-018-0002-7>
- 1229 Buhr, A. & Zebrowski, P. (2009). Sentence position and syntactic complexity of stuttering in early  
1230 childhood: A longitudinal study. *Journal of Fluency Disorders* 34, 155–172.
- 1231 Cabrera, D., Sato, H., Martens, W. L., & Lee, D. (2009). Binaural Measurement and Simulation of the  
1232 Room Acoustical Response From a Person's Mouth to Their Ears. *Acoustics Australia*, 37.
- 1233 Cacciola, A., Calamuneri, A., Milardi, D., Mormina, E., Chillemi, G., Marino, S., Naro, A., Rizzo, G., Anastasi,  
1234 G., & Quartarone, A. (2017). A Connectomic Analysis of the Human Basal Ganglia Network. *Frontiers in*  
1235 *neuroanatomy*, 11, 85. <https://doi.org/10.3389/fnana.2017.00085>
- 1236 Cai, S., Beal, D. S., Ghosh, S. S., Tiede, M. K., Guenther, F. H., & Perkell, J. S. (2012). Weak responses to  
1237 auditory feedback perturbation during articulation in persons who stutter: evidence for abnormal  
1238 auditory-motor transformation. *Plos One*, 7(7), e41830. <http://doi.org/10.1371/journal.pone.0041830>
- 1239 Calabresi, P., Picconi, B., Tozzi, A., Ghiglieri, V., & Di Filippo, M. (2014). Direct and indirect pathways of  
1240 basal ganglia: a critical reappraisal. *Nature Publishing Group*, 17(8), 1022–1030.  
1241 <http://doi.org/10.1038/nn.3743>
- 1242 Caligiore, D., Pezzulo, G., Baldassarre, G., Bostan, A. C., Strick, P. L., Doya, K., Helmich, R. C., Dirks, M.,  
1243 Houk, J., Jörntell, H., Lago-Rodriguez, A., Galea, J. M., Miall, R. C., Popa, T., Kishore, A., Verschure, P.  
1244 F., Zucca, R., & Herreros, I. (2017). Consensus Paper: Towards a Systems-Level View of Cerebellar  
1245 Function: the Interplay Between Cerebellum, Basal Ganglia, and Cortex. *Cerebellum (London,*  
1246 *England)*, 16(1), 203–229. <https://doi.org/10.1007/s12311-016-0763-3>
- 1247 Campbell, P., Constantino, C. & Simpson, S. (eds) (2019). Stammering Pride and Prejudice: Difference not  
1248 Deficit. J & R Press.
- 1249 Chang, E. F., Niziolek, C. A., Knight, R. T., Nagarajan, S. S., & Houde, J. F. (2013). Human cortical  
1250 sensorimotor network underlying feedback control of vocal pitch. *Proceedings of the National*  
1251 *Academy of Sciences*, 110(7), 2653–2658. <http://doi.org/10.1073/pnas.1216827110>
- 1252 Chang S.-E., Guenther F. H. (2020). Involvement of the cortico-basal ganglia-thalamocortical loop in  
1253 developmental stuttering. *Front. Psychol.* 10:3088. [10.3389/fpsyg.2019.03088](https://doi.org/10.3389/fpsyg.2019.03088)
- 1254 Cherry, C., Sayers, B. M. & Marland, P.M. (1956). Experiments upon the total inhibition of stammering by  
1255 external control, and some clinical results. *Journal of Psychosomatic Research*, 1, 233–  
1256 246. [https://doi.org/10.1016/0022-3999\(56\)90001-0](https://doi.org/10.1016/0022-3999(56)90001-0)
- 1257 Chordekar, S., Perez, R., Adelman, C., Sohmer, H., & Kishon-Rabin, L. (2018). Does hearing in response to  
1258 soft-tissue stimulation involve skull vibrations? A within-subject comparison between skull vibration  
1259 magnitudes and hearing thresholds. *Hearing Research*, 364, 59–67.  
1260 <http://doi.org/10.1016/j.heares.2018.03.030>
- 1261 Ciocca, V. (2008). The auditory organization of complex sounds. *Frontiers in Bioscience*, 13(1), 148–169.  
1262 <http://doi.org/10.2741/2666>
- 1263 Civier, O., Bullock, D., Max, L., & Guenther, F. H. (2013). Computational modeling of stuttering caused by  
1264 impairments in a basal ganglia thalamo-cortical circuit involved in syllable selection and initiation.  
1265 *Brain and Language*, 126(3), 263–278. <http://doi.org/10.1016/j.bandl.2013.05.016>
- 1266 Civier, O., Tasko, S. M., & Guenther, F. H. (2010). Overreliance on auditory feedback may lead to  
1267 sound/syllable repetitions: simulations of stuttering and fluency-inducing conditions with a neural  
1268 model of speech production. *Journal of Fluency Disorders*, 35(3), 246–279.  
1269 <http://doi.org/10.1016/j.jfludis.2010.05.002>
- 1270 Choo, A.L., Smith, S.A. & Li, H. (2020). Associations between stuttering, comorbid conditions and  
1271 executive function in children: a population-based study. *BMC Psychol* 31;8(1):113. doi:  
1272 10.1186/s40359-020-00481-7.
- 1273 Cody, A. R., Wilson, W., & Leah, J. (1996). Acoustically activated c-fos expression in auditory nuclei of the  
1274 anaesthetised guinea pig. *Brain Research*, 728(1), 72–78.
- 1275 Colebatch, J. G., Govender, S., & Rosengren, S. M. (2013). Two distinct patterns of VEMP changes with  
1276 age. *Clinical Neurophysiology : Official Journal of the International Federation of Clinical*  
1277 *Neurophysiology*, 124(10), 2066–2068. <http://doi.org/10.1016/j.clinph.2013.04.337>

- 1278 Constantino, C. D., Eichorn, N., Buder, E. H., Beck, J. G., & Manning, W. H. (2020). The Speaker's  
1279 Experience of Stuttering: Measuring Spontaneity. *Journal of Speech, Language, and Hearing Research*,  
1280 63(4), 983–1001. [http://doi.org/10.1044/2019\\_JSLHR-19-00068](http://doi.org/10.1044/2019_JSLHR-19-00068)
- 1281 Cooke, M., & Ellis, D. P. W. (2001). The auditory organization of speech and other sources in listeners and  
1282 computational models. *Speech Communication*, 35(3-4), 141–177. [http://doi.org/10.1016/S0167-](http://doi.org/10.1016/S0167-6393(00)00078-9)  
1283 6393(00)00078-9
- 1284 Craig, A., Hancock, K., Tran, Y., Craig, M., & Peters, K. (2002). Epidemiology of stuttering in the  
1285 community across the entire life span. *Journal of Speech, Language, and Hearing Research*, 45, 1097–  
1286 1105.
- 1287 Crivellaro Goncalves, I., Furquim de Andrade, C. R., & Gentile Matas, C. (2015). Auditory Processing of  
1288 Speech and Non-Speech Stimuli in Children who Stutter: Electrophysiological Evidences. *Brain*  
1289 *Disorders & Therapy*, 04(05), 1–5. <http://doi.org/10.4172/2168-975X.1000199>
- 1290 Cullinan, W.L. and Springer, M.T. (1980) Voice initiation and termination times in stuttering and  
1291 nonstuttering children., *Journal of Speech and Hearing Research*, 2, 344–60.
- 1292 Curthoys, I. S. (2017). The new vestibular stimuli: sound and vibration-anatomical, physiological and  
1293 clinical evidence. *Experimental Brain Research*, 235(4), 957–972. [http://doi.org/10.1007/s00221-017-](http://doi.org/10.1007/s00221-017-4874-y)  
1294 4874-y
- 1295 Curthoys, I. S., & Grant, J. W. (2015). How does high-frequency sound or vibration activate vestibular  
1296 receptors? *Experimental Brain Research*, 233(3), 691–699. [http://doi.org/10.1007/s00221-014-](http://doi.org/10.1007/s00221-014-4192-6)  
1297 6
- 1298 Curthoys, I. S., Grant, J. W., Burgess, A. M., Pastras, C. J., Brown, D. J., & Manzari, L. (2018). Otolithic  
1299 Receptor Mechanisms for Vestibular- Evoked Myogenic Potentials: A Review. *Frontiers in Neurology*,  
1300 9, 366. <http://doi.org/10.3389/fneur.2018.00366>
- 1301 Curthoys, I. S., Grant, J. W., Pastras, C. J., Brown, D. J., Burgess, A. M., Brichta, A. M., & Lim, R. (2019). A  
1302 review of mechanical and synaptic processes in otolith transduction of sound and vibration for clinical  
1303 VEMP testing. *Journal of Neurophysiology*. <http://doi.org/10.1152/jn.00031.2019>
- 1304 Curthoys, I. S., Kim, J., McPhedran, S. K., & Camp, A. J. (2006). Bone conducted vibration selectively  
1305 activates irregular primary otolithic vestibular neurons in the guinea pig. *Experimental Brain Research*,  
1306 175(2), 256–267. <http://doi.org/10.1007/s00221-006-0544-1>
- 1307 DeLong, M.R. Primate models of movement disorders of basal ganglia origin. (1990). *Trends Neurosci.* 13,  
1308 281–285.
- 1309 Denhardt (1890). *Das Stottern: eine Psychose*. Leipzig.
- 1310 Drayna D, Kilshaw J, Kelly J. (1999). The sex ratio in familial persistent stuttering. *Am. J. Hum.*  
1311 *Genet.*65:1473–75
- 1312 Dunovan, K., Lynch, B., Molesworth, T., & Verstynen, T. (2015). Competing basal ganglia pathways  
1313 determine the difference between stopping and deciding not to go. *eLife*, 4 (September 2015),  
1314 e08723. <http://doi.org/10.7554/eLife.08723>
- 1315 Eisenson, J and Horowitz, E (1945) "The influence of propositionality on stuttering" *Journal of Speech*  
1316 *Disorders*, 10, 193-197.
- 1317 Ekdale E. G. (2013). Comparative Anatomy of the Bony Labyrinth (Inner Ear) of Placental Mammals. *PLoS*  
1318 *one*, 8(6), e66624. <https://doi.org/10.1371/journal.pone.0066624>
- 1319 Eliades, S. J., & Wang, X. (2017). Contributions of sensory tuning to auditory-vocal interactions in  
1320 marmoset auditory cortex. *Hearing Research*, 348, 98–111.  
1321 <http://doi.org/10.1016/j.heares.2017.03.001>
- 1322 Eliades, S. J., & Tsunada, J. (2018). Auditory cortical activity drives feedback-dependent vocal control in  
1323 marmosets. *Nature Communications*, 9(1), 2540–13. <http://doi.org/10.1038/s41467-018-04961-8>  
1324
- 1325 Ellis, J. (2020). The Clearing: Music, dysfluency, blackness and time. *Journal of Interdisciplinary Voice*  
1326 *Studies*, Volume 5, number 2, 215–233.
- 1327 Elsherif M.M., Wheeldon L.R., Frisson S. (2021). Do dyslexia and stuttering share a processing deficit? *J*  
1328 *Fluency Disord.* 67:105827. doi: 10.1016/j.jfludis.2020.105827.
- 1329 Etchell, A. C., Civier, O., Ballard, K. J., & Sowman, P. F. (2017). A systematic literature review of  
1330 neuroimaging research on developmental stuttering between 1995 and 2016. *Journal of Fluency*  
1331 *Disorders*. <http://doi.org/10.1016/j.jfludis.2017.03.007>

## Weak vestibular response in persistent developmental stuttering and implications for own voice identification

- 1332 Evans J. St. (2007). "Dual-processing accounts of reasoning, judgment, and social cognition". Annual  
1333 Review of Psychology. 59: 268–269. doi:10.1146/annurev.psych.59.103006.093629. PMID 18154502.
- 1334 Fairbanks G. (1954) Systematic Research In Experimental Phonetics: 1. A Theory Of The Speech  
1335 Mechanism As A Servosystem. Journal of Speech and Hearing Disorders; 19(2):133–139. <https://doi.org/10.1044/jshd.1902.133> PMID: 13212816
- 1336
- 1337 Fenoy, A. J., Severson, M. A., Volkov, I. O., Brugge, J. F., & Howard, M. A. (2006). Hearing suppression  
1338 induced by electrical stimulation of human auditory cortex. *Brain Research*, 1118(1), 75–83.  
1339 <http://doi.org/10.1016/j.brainres.2006.08.013>
- 1340 Fernyhough, C., & Russell, J. (1997). Distinguishing Ones Own Voice from Those of Others A Function for  
1341 Private Speech. *International Journal of Behavioral ...*
- 1342 Florentine M., Popper A., Fay R. (eds) Loudness. Springer Handbook of Auditory Research, vol 37.  
1343 Springer, New York, NY. [https://doi.org/10.1007/978-1-4419-6712-1\\_5](https://doi.org/10.1007/978-1-4419-6712-1_5)
- 1344 Fodor, Jerry A., (1987) "Meaning and the world order" from Fodor, Jerry, A., *Psychosemantics: the*  
1345 *problem of meaning in the philosophy of mind* pp.97-127, Cambridge, Massachusetts: The MIT Press
- 1346 Ford, J. M. & Mathalon, D. H. (2004). Electrophysiological evidence of corollary discharge dysfunction in  
1347 schizophrenia during talking and thinking. *Journal of Psychiatric Research*, 38(1), 37–46.  
1348 [http://doi.org/10.1016/s0022-3956\(03\)00095-5](http://doi.org/10.1016/s0022-3956(03)00095-5)
- 1349 Foundas, A. L., Mock, J. R., Corey, D. M., Golob, E. J., & Conture, E. G. (2013). The SpeechEasy device in  
1350 stuttering and nonstuttering adults: fluency effects while speaking and reading. *Brain and Language*,  
1351 126(2), 141–150. <http://doi.org/10.1016/j.bandl.2013.04.004>
- 1352 Frigerio-Domingues, C., & Drayna, D. (2017). Genetic contributions to stuttering: the current evidence.  
1353 *Molecular Genetics & Genomic Medicine*, 5(2), 95–102. <http://doi.org/10.1002/mgg3.276>
- 1354 Fu, C. H. Y., Vythelingum, G. N., Brammer, M. J., Williams,  
1355 S. C. R., Amaro, E., Andrew, C. M., . . . McGuire, P. K. (2006). An fMRI study of verbal self-monitoring:  
1356 Neural correlates of auditory verbal feedback. *Cerebral Cortex*, 16(7), 969–977.  
1357 <https://doi.org/10.1093/cercor/bhj039>
- 1358 Garcia-Barrera, M. A., & Davidow, J. H. (2015). Anticipation in stuttering: A theoretical model of the  
1359 nature of stutter prediction. *Journal of Fluency Disorders*, 44, 1–15.  
1360 <http://doi.org/10.1016/j.jfludis.2015.03.002>
- 1361 Gattie, M.C.D., Howell, P., Kluk, K., & Lieven, E. (2019, June 30). Vestibular Evoked Myogenic Potentials in  
1362 Persistent Developmental Stuttering. Retrieved from [osf.io/9mukg](https://osf.io/9mukg)
- 1363 Gattie, M.C.D., Lieven, E. & Kluk, K. (submitted, 2020) Weak vestibular response in persistent  
1364 developmental stuttering
- 1365 Galantucci B., Fowler C.A., Turvey M.T. (2006). The motor theory of speech perception reviewed.  
1366 *Psychonomic Bulletin & Review*;13(3):361–377.
- 1367 Gallagher, S. & Zahavi, D. (2021). "Phenomenological Approaches to Self-Consciousness", *The Stanford*  
1368 *Encyclopedia of Philosophy* (Spring 2021 Edition), Edward N. Zalta (ed.), URL =  
1369 <<https://plato.stanford.edu/archives/spr2021/entries/self-consciousness-phenomenological/>>.
- 1370 Goldberg, J.M. (ed) (2012), The vestibular system: a sixth sense. (2012). Oxford University Press Inc
- 1371 Golding, N. L., & Oertel, D. (2012). Synaptic integration in dendrites: exceptional need for speed. *The*  
1372 *Journal of Physiology*, 590(22), 5563–5569. <http://doi.org/10.1113/jphysiol.2012.229328>
- 1373
- 1374 Gould, E. & Sheehan, J (1967). "Effect of silence on stuttering" *Journal of Abnormal Psychology*, 72, 5,  
1375 441–445.
- 1376 Govender, S., Todd, N. P. M., & Colebatch, J. G. (2020). Mapping the vestibular cerebellar evoked  
1377 potential (VsCEP) following air- and bone-conducted vestibular stimulation. *Experimental Brain*  
1378 *Research*, 238(3), 601–620. <http://doi.org/10.1007/s00221-020-05733-x>
- 1379 Grant, W., & Curthoys, I. (2017). Otoliths - Accelerometer and seismometer; Implications in Vestibular  
1380 Evoked Myogenic Potential (VEMP). *Hearing Research*, 353, 26–35.  
1381 <http://doi.org/10.1016/j.heares.2017.07.012>

- 1382 Greenlee, J. D. W., Jackson, A. W., Chen, F., Larson, C. R., Oya, H., Kawasaki, H., et al. (2011). Human  
1383 Auditory Cortical Activation during Self-Vocalization. *Plos One*, 6(3), e14744.  
1384 <http://doi.org/10.1371/journal.pone.0014744>
- 1385 Gregory, H.H. (ed.) (1979). *Controversies about Stuttering Therapy*. Baltimore: University Park Press.
- 1386 Grice, P. (1957). 'Meaning', *The Philosophical Review*, 66: 377–88.
- 1387 Grice, P. (1989). *Studies in the Way of Words* Cambridge MA: Harvard University Press.
- 1388 Guenther, F. H., Ghosh, S. S., & Tourville, J. A. (2006). Neural modeling and imaging of the cortical  
1389 interactions underlying syllable production. *Brain and Language*, 96, 280–301.
- 1390 Haas, H. (1951). "Über den Einfluss eines Einfachechos auf die Hørsamkeit von Sprache," *Acustica*, 1, 49–  
1391 58.
- 1392 Haber S. N. (2014). The place of dopamine in the cortico-basal ganglia circuit. *Neuroscience*, 282, 248–  
1393 257. <https://doi.org/10.1016/j.neuroscience.2014.10.008>
- 1394 Hadamard, J. (1902). Sur les problèmes aux dérivées partielles et leur signification physique. Princeton  
1395 University Bulletin. pp. 49–52.
- 1396 Hadamard, J. (1923). *Lectures on Cauchy's Problem in Linear Partial Differential Equations*. Yale  
1397 University Press, New Haven CT.
- 1398 Han, T.-U., Root, J., Reyes, L. D., Huchinson, E. B., Hoffmann, Du, J., Lee, W. S., et al. (2019). Human  
1399 GNPTAB stuttering mutations engineered into mice cause vocalization deficits and astrocyte  
1400 pathology in the corpus callosum. *Proceedings of the National Academy of Sciences of the United*  
1401 *States of America*, 116(35), 17515–17524. <http://doi.org/10.1073/pnas.1901480116>
- 1402 Hannley, M., & Dorman, M. F. (1982). Some observations on auditory function and stuttering. *Journal of*  
1403 *Fluency Disorders*, 7(1), 93–108. [http://doi.org/10.1016/S0094-730X\(82\)80003-X](http://doi.org/10.1016/S0094-730X(82)80003-X)
- 1404 Helmholtz, H. (1886). *Handbuch der Physiologischen Optik*. Leipzig: Voss.
- 1405 Herder, C., Howard, C., Nye, C., Vanryckeghem, M., (2006). Effectiveness of behavioural stuttering  
1406 treatment: a systematic review and meta-analysis. *Contemporary Issues in Communication Science*  
1407 *and Disorders*, 33, 61–73.
- 1408 Hickok, G., & Poeppel, D. (2007). The cortical organization of speech processing. *Nature Reviews*  
1409 *Neuroscience*, 8(5), 393–402. <http://doi.org/doi:10.1038/nrn2113>
- 1410 Hickok, G. (2017). A cortical circuit for voluntary laryngeal control: Implications for the evolution  
1411 language. *Psychon Bull Rev* 24, 56–63. <https://doi.org/10.3758/s13423-016-1100-z>
- 1412 Hickok, G., Houde, J., & Rong, F. (2011). Sensorimotor integration in speech processing: computational  
1413 basis and neural organization. *Neuron*, 69(3), 407–422. <http://doi.org/10.1016/j.neuron.2011.01.019>
- 1414 Hirano, S., Kojima, H., Naito, Y., Honjo, I., Kamoto, Y., Okazawa, H., . . . Konishi, J. (1997). Cortical  
1415 processing mechanism for vocalization with auditory verbal feedback. *NeuroReport*, 8(9–10), 2379–  
1416 2382.
- 1417 von Holst, E., and Mittelstädt, H. (1950). Das refferenzprinzip. *Naturwissenschaften* 37, 464–476. doi:  
1418 10.1007/bf00622503
- 1419 Hoshi E., Tremblay L., Féger J., Carras P.L., Strick P.L. (2005). The cerebellum communicates with the basal  
1420 ganglia. *Nat Neurosci*;8(11):1491–1493. doi: 10.1038/nn1544.
- 1421 Hotehama, T., & Nakagawa, S. (2012). Propagation Velocity of Bone-Conducted Ultrasound in the Human  
1422 Head. *Japanese Journal of Applied Physics*, 51(7S), 07GF21. <http://doi.org/10.1143/JJAP.51.07GF21>
- 1423 Houde, J. F., & Nagarajan, S. S. (2016). Speech motor control from a modern control theory perspective.  
1424 *Neurobiology of Language*. <http://doi.org/10.1016/B978-0-12-407794-2.00019-5>
- 1425 Houde, J. F., & Chang, E. F. (2015). The cortical computations underlying feedback control in vocal  
1426 production. *Current Opinion in Neurobiology*, 33, 174–181. <http://doi.org/10.1016/j.conb.2015.04.006>
- 1427 Howell, P., El-Yaniv, N., & Powell, D. J. (1987). Factors affecting fluency in stutterers when speaking under  
1428 altered auditory feedback. In H. Peters & W. Hulstijn (Eds.), (pp. 361–369). *Speech Motor Dynamics in*  
1429 *Stuttering*.
- 1430 Howell, P. (2004). Effects of delayed auditory feedback and frequency-shifted feedback on speech control  
1431 and some potentials for future development of prosthetic aids for stammering. *Stammering Research*  
1432 *: an on-Line Journal Published by the British Stammering Association*, 1(1), 31–46.
- 1433 Howell, P., Marchbanks, R. J., & El-Yann, N. (1986). Middle ear muscle activity during vocalization in  
1434 normal speakers and stutterers. *Acta Oto-Laryngologica*, 102(5-6), 396–402.  
1435 <http://doi.org/10.3109/00016488609119423>

## Weak vestibular response in persistent developmental stuttering and implications for own voice identification

- 1436 Howell, P., Powell, D. J., & Khan, I. (1983). Amplitude contour of the delayed signal and interference in  
1437 delayed auditory feedback tasks. *Journal of Experimental Psychology*, 1–13.
- 1438 Huettig, F., & Hartsuiker, R. J. (2010). Listening to yourself is like listening to others: External, but not  
1439 internal, verbal self-monitoring is based on speech perception. *Language and Cognitive Processes*,  
1440 25(3), 347–374. <http://doi.org/10.1080/01690960903046926>
- 1441 Irvine D.R.F. (1992) Physiology of the Auditory Brainstem. In: Popper A.N., Fay R.R. (eds) The Mammalian  
1442 Auditory Pathway: Neurophysiology. Springer Handbook of Auditory Research, vol 2. Springer, New  
1443 York, NY
- 1444 Isaacs, D. (2020). 'I Don't Have Time For This': Stuttering and the Politics of University Time. *Scandinavian*  
1445 *Journal of Disability Research*, 22(1), 58–67. DOI: <http://doi.org/10.16993/sjdr.601>
- 1446 Iverach, L., Rapee, R. M., Wong, Q. J. J., & Lowe, R. (2017). Maintenance of Social Anxiety in Stuttering: A  
1447 Cognitive-Behavioral Model. *American Journal of Speech-Language Pathology*, 26(2), 540–17.  
1448 [http://doi.org/10.1044/2016\\_AJSLP-16-0033](http://doi.org/10.1044/2016_AJSLP-16-0033)
- 1449 Jackson, E., Yaruss, J. S., Quesal, R. W., Terranova, V., & Whalen, D. (2015). Responses of adults who  
1450 stutter to the anticipation of stuttering. *Journal of Fluency Disorders*, 45, 38–51.
- 1451 Jones, D. K., Knösche, T. R., & Turner, R. (2013). White matter integrity, fiber count, and other fallacies:  
1452 The do's and don'ts of diffusion MRI. *NeuroImage*, 73, 239–254. doi:10.1016/j.  
1453 neuroimage.2012.06.081
- 1454 Jürgens, U. (2002). Neural pathways underlying vocal control. *Neuroscience & Biobehavioral Reviews*,  
1455 26(2), 235–258.
- 1456 Johnson, M., Baxter, S., Blank, L., Cantrell, A., Brumfitt, S., Enderby, P., & Goyder, E. (2015). The state of  
1457 the art in non-pharmacological interventions for developmental stuttering. Part 2: qualitative  
1458 evidence synthesis of views and experiences. *International Journal of Language & Communication*  
1459 *Disorders*, 51(1), 3–17. <http://doi.org/10.1111/1460-6984.12182>
- 1460 Johnson, W. (1961). Stuttering and what you can do about it. Danville, IL: The Interstate Printers &  
1461 Publishers, Inc
- 1462 Jones, L. A., Hills, P. J., Dick, K. M., Jones, S. P., & Bright, P. (2016). Cognitive mechanisms associated with  
1463 auditory sensory gating. *Brain and cognition*, 102, 33–45.  
1464 <https://doi.org/10.1016/j.bandc.2015.12.005>
- 1465 Kaga, K. (2016). Auditory nerve disease and auditory neuropathy spectrum disorders. *Auris, Nasus,*  
1466 *Larynx*, 43(1), 10–20. <http://doi.org/10.1016/j.anl.2015.06.008>
- 1467 Kahneman, D. (2011). Thinking, fast and slow (1st ed.). New York: Farrar, Straus and Giroux. ISBN  
1468 9780374275631.
- 1469 Kalinowski, J., Armson, J., Roland-Mieszkowski, M., Stuart, A. and Gracco, V. L. (1993). Effects of  
1470 alterations in auditory feedback and speech rate on stuttering frequency. *Language and Speech*, 36,  
1471 1–16.
- 1472 Kaplan, J. T., Aziz-Zadeh, L., Uddin, L. Q., & Iacoboni, M. (2008). The self across the senses: an fMRI study  
1473 of self-face and self-voice recognition. *Social Cognitive and Affective Neuroscience*, 3(3), 218–223.  
1474 <http://doi.org/10.1093/scan/nsn014>
- 1475 Karniol, R. (1995) Stuttering, language, and cognition: A review and a model of stuttering as  
1476 suprasegmental sentence plan alignment (SPA). *Psychological Bulletin*, 117, 104-124.
- 1477 Kato T, Shiraishi K, Eura Y, Shibata K, Sakata T, Morizono T, Soda T. (1998 ) A 'neural' response with 3ms  
1478 latency evoked by loud sound in profoundly deaf patients. *Audiol Neurootol*;3:253–64.
- 1479 Kern (1932) Der Einfluss des Hörens auf das Stottern. *Arch. Psychiat.* 97, 429449.
- 1480 Kobayashi, H., & Hayasaka, K. (2003). Manual Diadochokinetic Movements in Children with Stuttering  
1481 and Phonological Disorders. *Japanese Journal of Special Education*, 40, 649–662.
- 1482 Kolarik, A. J., Cirstea, S., Pardhan, S., & Moore, B. C. J. (2014). A summary of research investigating  
1483 echolocation abilities of blind and sighted humans. *Hearing Research*, 310, 60–68.  
1484 <http://doi.org/10.1016/j.heares.2014.01.010>
- 1485 Kraft, S. J., & Yairi, E. (2012). Genetic Bases of Stuttering: The State of the Art, 2011. *Folia Phoniatica Et*  
1486 *Logopaedica*, 64(1), 33–46. <http://doi.org/10.1159/000331073>



- 1487 Kramer, M. B., Green, D., & Guitar, B. (1987). A comparison of stutterers and nonstutterers on masking  
1488 level differences and synthetic sentence identification tasks. *Journal of Communication Disorders*,  
1489 20(5), 379–390.
- 1490 Kröger, B. J., Crawford, E., Bekolay, T., & Eliasmith, C. (2016). Modeling Interactions between Speech  
1491 Production and Perception: Speech Error Detection at Semantic and Phonological Levels and the Inner  
1492 Speech Loop. *Frontiers in Computational Neuroscience*, 10, 51.  
1493 <http://doi.org/10.3389/fncom.2016.00051>
- 1494 Lakatos, I.M. (1970) "Falsification and the Methodology of Scientific Research Programmes", in Lakatos &  
1495 Musgrave (eds) *Criticism and the Growth of Knowledge*, Cambridge: Cambridge University Press.
- 1496 Langová, J & Sváb, L (1973) "Reduction of stuttering under experimental social isolation: The role of  
1497 adaptation effect" *Folia Phoniatica*, 25, 17–22.
- 1498 Langová, J., Morávek, M., Široký & Sváb, L. (1975) "Effect of speaking on evoked vestibular nystagmus in  
1499 stutterers" *Folia Phoniatica*, 27(4), 287–291.
- 1500 Laukli, E., & Burkard, R. (2015). Calibration/Standardization of Short-Duration Stimuli. *Seminars in*  
1501 *Hearing*, 36(1), 3–10. <http://doi.org/10.1055/s-0034-1396923>
- 1502 Levelt, W.J. (1989) *Speaking: From intention to articulation* Cambridge, MA: MIT Press.
- 1503 Levelt, W.J., Roelofs, A., & Meyer, A. S. (1999). A theory of lexical access in speech production. *The*  
1504 *Behavioral and Brain Sciences*, 22(1), 1–38– discussion 38–75.  
1505 <http://doi.org/10.1017/s0140525x99001776>
- 1506 Liebetrau, R. M., & Daly, D. A. (1981). Auditory processing and perceptual abilities of "organic" and  
1507 'functional' stutterers. *Journal of Fluency Disorders*.
- 1508 Liberman, A. M., & Mattingly, I. G. (1985). The motor theory of speech perception revised. *Cognitive and*  
1509 *Behavioral Neurology*, 21(1), 1–36.
- 1510 Lind, A., Hall, L., Breidegard, B., Balkenius, C., & Johansson, P. (2014). Auditory feedback of one's own  
1511 voice is used for high-level semantic monitoring: the 'self-comprehension' hypothesis. *Frontiers in*  
1512 *Human Neuroscience*, 8, 166. <http://doi.org/10.3389/fnhum.2014.00166>
- 1513 Liotti, M., Ingham, J. C., Takai, O., Paskos, D. K., Perez, R., & Ingham, R. J. (2010). Spatiotemporal  
1514 dynamics of speech sound perception in chronic developmental stuttering. *Brain and Language*,  
1515 115(2), 141–147. <http://doi.org/10.1016/j.bandl.2010.07.007>
- 1516 Lipton, P. (2004). *Inference to the Best Explanation*, (2nd ed.), London: Routledge.
- 1517 Ludlow, C. L., & Loucks, T. (2003). Stuttering: a dynamic motor control disorder. *Journal of Fluency*  
1518 *Disorders*, 28(4), 273–95– quiz 295. <http://doi.org/10.1016/j.jfludis.2003.07.001>
- 1519 Lupyan, G., & Swingle, D. (2012). Self-directed speech affects visual search performance. *Quarterly*  
1520 *Journal of Experimental Psychology (2006)*, 65(6), 1068–1085.  
1521 <http://doi.org/10.1080/17470218.2011.647039>
- 1522 MacCulloch, M. J., & Eaton, R. (1971). A note on reduced auditory pain threshold in 44 stuttering  
1523 children. *The British Journal of Disorders of Communication*, 6(2), 148–153.  
1524 <http://doi.org/10.3109/13682827109011541>
- 1525 MacKay D. G. (1969). Effects of ambiguity on stuttering: towards a theory of speech production at the  
1526 semantic level. *Kybernetik*, 5(5), 195–208. <https://doi.org/10.1007/BF00288943>
- 1527 Maffei, C., Sarubbo, S., & Jovicich, J. (2019). A Missing Connection: A Review of the Macrostructural  
1528 Anatomy and Tractography of the Acoustic Radiation. *Frontiers in Neuroanatomy*, 13.  
1529 <http://doi.org/10.3389/fnana.2019.00027>
- 1530 Manley, G. A., Gummer, A., Popper, A.N. & Fay, R.R. (eds) (2017). *Understanding the Cochlea*. Springer  
1531 Science & Business Media.
- 1532 Maraist, J. A. and Hutton, C. (1957) Effects of auditory masking upon the speech of stutterers. *J. Speech*  
1533 *Dis.* 22, 385-389.
- 1534 Mason S, Garnham C & Hudson B. (1996) Electric response audiometry in young children before cochlear  
1535 implantation: a short latency component. *Ear Hear.* 17:537–43.
- 1536 Matuschek, H., Kliegl, R., Vasishth, S., Baayen, H., & Bates, D. (2017). Balancing Type I error and power in  
1537 linear mixed models. *Journal of Memory and Language*, 94, 305–315.  
1538 <http://doi.org/10.1016/j.jml.2017.01.001>
- 1539 Maurer, D., & Landis, T. (1990). Role of Bone Conduction in the Self-Perception of Speech. *Folia*  
1540 *Phoniatica Et Logopaedica*, 42(5), 226–229. <http://doi.org/10.1159/000266070>

## Weak vestibular response in persistent developmental stuttering and implications for own voice identification

- 1541 Maguire, G. A., Nguyen, D. L., Simonson, K. C., & Kurz, T. L. (2020). The Pharmacologic Treatment of  
1542 Stuttering and Its Neuropharmacologic Basis. *Frontiers in Neuroscience*, *14*, 158.  
1543 <http://doi.org/10.3389/fnins.2020.00158>
- 1544 Månsson H. (2000) Identification of stuttering in pre- school children: a multifactorial, longitudinal study  
1545 in development. *J Fluency Disord*;25(3):241
- 1546 Martin, D. (2016). Stuttering from the Anus. *Canadian Journal of Disability Studies*, *5*(3), 114–134.  
1547 <https://doi.org/10.15353/cjids.v5i3.299>
- 1548 Mariën, P., & Manto, M. (2015). *The linguistic cerebellum*. Academic Press.
- 1549 Matthews, N., Todd, J., Mannion, D. J., Finnigan, S., Catts, S., & Michie, P. T. (2013). Impaired processing  
1550 of binaural temporal cues to auditory scene analysis in schizophrenia. *Schizophrenia Research*, *146*(1-  
1551 3), 344–348. <http://doi.org/10.1016/j.schres.2013.02.013>
- 1552 Max, L., Guenther, F. H., Gracco, V. L., Ghosh, S. S., & Wallace, M. E. (2004). Unstable or insufficiently  
1553 activated internal models and feedback-biased motor control as sources of dysfluency: A theoretical  
1554 model of stuttering. *Contemporary Issues in Communication Science and Disorders*, *31*, 105–122.
- 1555 Max, L. (2004). Stuttering and internal models for sensorimotor control: A theoretical perspective to  
1556 generate testable hypotheses. In B. Maassen, R. Kent, H. F. M. Peters, P. van Lieshout, & W. Hulstijn  
1557 (Eds.), *Speech motor control in normal and disordered speech* (pp. 357–387). Oxford, UK: Oxford  
1558 University Press.
- 1559 Max, L., & Baldwin, C. J. (2010). The role of motor learning in stuttering adaptation: repeated versus  
1560 novel utterances in a practice-retention paradigm. *Journal of Fluency Disorders*, *35*(1), 33–43.  
1561 <http://doi.org/10.1016/j.jfludis.2009.12.003>
- 1562 McLachlan, N. M., Phillips, D. S., Rossell, S. L., & Wilson, S. J. (2013). Auditory processing and  
1563 hallucinations in schizophrenia. *Schizophrenia Research*, *150*(2-3), 380–385.  
1564 <http://doi.org/10.1016/j.schres.2013.08.039>
- 1565 McKnight, R. C., & Cullinan, W. L. (1987). Subgroups of stuttering children: Speech and voice reaction  
1566 times, segmental durations, and naming latencies. *Journal of Fluency Disorders*, *12*(3), 217–233.  
1567 doi:10.1016/0094-730X(87)90028-3
- 1568 McNerney, K. M., & Burkard, R. F. (2011). The vestibular evoked myogenic potential (VEMP): air- versus  
1569 bone-conducted stimuli. *Ear and Hearing*, *32*(6), e6–e15.  
1570 <http://doi.org/10.1097/AUD.0b013e3182280299>
- 1571 Meekings, S., Boebinger, D., Evans, S., Lima, C. F., Chen, S., Ostarek, M., & Scott, S. K. (2015). Do We  
1572 Know What We're Saying? The Roles of Attention and Sensory Information During Speech Production.  
1573 *Psychological Science*, *26*(12), 1975–1977. <http://doi.org/10.1177/0956797614563766>
- 1574 Meibauer, J. & Steinbach, M. (2011). *Experimental Pragmatics/semantics*. Amsterdam: John Benjamins  
1575 Pub. Co. ISBN 9789027255587
- 1576 Metzger, F. L., Auer, T., Helms, G., Paulus, W., Frahm, J., Sommer, M., & Neef, N. E. (2017). Shifted  
1577 dynamic interactions between subcortical nuclei and inferior frontal gyri during response preparation  
1578 in persistent developmental stuttering. *Brain Structure & Function*, *223*(1), 165–182.  
1579 <http://doi.org/10.1007/s00429-017-1476-1>
- 1580 Milardi, D., Quartarone, A., Bramanti, A., Anastasi, G., Bertino, S., Basile, G. A., Buonasera, P., Pilone, G.,  
1581 Celeste, G., Rizzo, G., Bruschetta, D., & Cacciola, A. (2019). The Cortico-Basal Ganglia-Cerebellar  
1582 Network: Past, Present and Future Perspectives. *Frontiers in systems neuroscience*, *13*, 61.  
1583 <https://doi.org/10.3389/fnsys.2019.00061>
- 1584 Miller N.E. (1944) Experimental Studies of Conflict. In Hunt, J. McV (ed) "Personality and the Behavior  
1585 Disorders". New York: Ronald Press.
- 1586 Mink, J. W. (1996). The basal ganglia: Focused selection and inhibition of competing motor programs.  
1587 *Progress in Neurobiology*, *50*, 381–425.
- 1588 Mink, J. W. (2018). Basal ganglia mechanisms in action selection, plasticity, and dystonia. *European*  
1589 *Journal of Paediatric Neurology : EJPN : Official Journal of the European Paediatric Neurology Society*,  
1590 *22*(2), 225–229. <http://doi.org/10.1016/j.ejpn.2018.01.005>
- 1591 Mozaffarilegha, M., Namazi, H., Tahaei, A. A., & Jafari, S. (2019). Complexity-Based Analysis of the  
1592 Difference Between Normal Subjects and Subjects with Stuttering in Speech Evoked Auditory

- 1593 Brainstem Response. *Journal of Medical and Biological Engineering*, 39(4), 490–497.  
1594 <http://doi.org/10.1007/s40846-018-0430-x>
- 1595 Murofushi, T., Iwasaki, S., Takai, Y., & Takegoshi, H. (2005). Sound-evoked neurogenic responses with  
1596 short latency of vestibular origin. *Clinical Neurophysiology*, 116(2), 401–405.  
1597 <http://doi.org/10.1016/j.clinph.2004.09.005>
- 1598 Musicant A. D. & Butler R. A. (1984). The influence of pinnae-based spectral cues on sound localization.  
1599 *The Journal of the Acoustical Society of America*, 75(4): 1195-1200
- 1600 Mysak, E.D. (1969). *Speech Pathology and Feedback Theory*. Charles C Thomas, Illinois.
- 1601 Nakagawa, S., Johnson, P.C.D. & Schielzeth, H. (2017). The Coefficient of Determination R<sup>2</sup> and Intra-  
1602 Class Correlation Coefficient from Generalized Linear Mixed-Effects Models Revisited and  
1603 Expanded. *Journal of the Royal Society Interface* 14 (134):  
1604 20170213. <https://doi.org/10.1098/rsif.2017.0213>.
- 1605 Neef, N. E., Anwander, A., & Friederici, A. D. (2015). The Neurobiological Grounding of Persistent  
1606 Stuttering: from Structure to Function. *Current Neurology and Neuroscience Reports*, 15(9), 63.  
1607 <http://doi.org/10.1007/s11910-015-0579-4>
- 1608 Neelly, J. M. (1961) A study of the speech behaviour of stutterers and nonstutterers under normal and  
1609 delayed auditory feedback. / *speech hear. Disord. monogr. Suppl*, No. 7.
- 1610 Newlands, S. D., Vrabec, J. T., Purcell, I. M., Stewart, C. M., Zimmerman, B. E., & Perachio, A. A. (2003).  
1611 Central projections of the saccular and utricular nerves in macaques. *The Journal of Comparative*  
1612 *Neurology*, 466(1), 31–47. <http://doi.org/10.1002/cne.10876>
- 1613 Nong, D. X., Ura, M., Owa, T., & Noda, Y. (2000). An acoustically evoked short latency negative response  
1614 in profound hearing loss patients. *Acta Oto-Laryngologica*, 120(8), 960–966.  
1615 <http://doi.org/10.1080/00016480050218708>
- 1616 Nong, D. X., Ura, M., Kyuna, A., Owa, T., & Noda, Y. (2002). Saccular origin of acoustically evoked short  
1617 latency negative response. *Otology & Neurotology*, 23(6), 953–957.  
1618 <http://doi.org/10.1097/00129492-200211000-00024>
- 1619
- 1620 Norris, D., McQueen, J. M., & Cutler. (2000). Merging information in speech recognition: Feedback is  
1621 never necessary. *The Behavioral and Brain Sciences*, 23(3), 299–325.  
1622 <http://doi.org/10.1017/S0140525X00003241>
- 1623 Noveck, I.A., and Sperber, D. (2004). *Experimental Pragmatics*. Basingstoke, Hampshire: Palgrave  
1624 Macmillan. ISBN 9781403903501
- 1625 Noveck, I.A. (2018). *Experimental Pragmatics: The Making of a Cognitive Science*. Cambridge: CUP.  
1626 ISBN 9781107084902
- 1627 Nozari, N., Dell, G. S., & Schwartz, M. F. (2011). Is comprehension necessary for error detection? A  
1628 conflict-based account of monitoring in speech production. *Cognitive Psychology*, 63(1), 1–33.  
1629 <http://doi.org/10.1016/j.cogpsych.2011.05.001>
- 1630 Ntourou, K., Conture, E. G., & Lipsey, M. W. (2011). Language abilities of children who stutter: A meta-  
1631 analytical review. *American Journal of Speech-Language Pathology*, 20(3), 163–179.  
1632 [https://doi.org/10.1044/1058-0360\(2011/09-0102\)](https://doi.org/10.1044/1058-0360(2011/09-0102))
- 1633 Nittrouer, S., & Cheney, C. (1984). Operant techniques used in stuttering therapy: A review. *Journal of*  
1634 *Fluency Disorders*, 9(3), 169–190. [http://doi.org/10.1016/0094-730X\(84\)90011-1](http://doi.org/10.1016/0094-730X(84)90011-1)
- 1635 Oliver, D.L., Cant, N.B., Fay, R.R. & Popper, A.N. (eds) (2018) *Vertebrate Sound Production and Acoustic*  
1636 *Communication*. Springer Handbook of Auditory Research, vol 65. Springer, New York, NY
- 1637 Ofoe L.C., Anderson J.D., Ntourou K. (2018). Short-term memory, inhibition, and attention in  
1638 developmental stuttering: a meta-analysis. *J Speech Lang Hear Res*;61(7):1626–1648. doi:  
1639 10.1044/2018\_JSLHR-S-17-0372.
- 1640 Ozdemir, R., Roelofs, A., & Levelt, W. J. M. (2007). Perceptual uniqueness point effects in monitoring  
1641 internal speech. *Cognitive and Behavioral Neurology*, 105(2), 457–465.  
1642 <http://doi.org/10.1016/j.cognition.2006.10.006>
- 1643 Papanthanasidou E, Zamba-Papanicolaou E, Pantziaris M, Kyriakides T, Papacostas S, Myriantopoulou P, et  
1644 al. (2003) Click evoked neurogenic vestibular potentials (NVESTEPs): a method of assessing the  
1645 function of the vestibular system. *Electromyogr Clin Neurophysiol*. 43:399–408.

## Weak vestibular response in persistent developmental stuttering and implications for own voice identification

- 1646 Papathanasiou ES, Theocharidou EK, Papacostas SS. (2006) Parallel auditory vestibular evoked  
1647 neurogenic and myogenic potential results in a case of peripheral vestibular dysfunction, showing that  
1648 the former originates from the vestibular system. *Electromyogr Clin Neurophysiol*. 46:105–11.
- 1649 Papathanasiou ES, Zamba-Papanicolaou E, Pantziaris M, Kleopas K, Kyriakides T, Papacostas S, et al.  
1650 (2004) Neurogenic vestibular evoked potentials using a tone pip auditory stimulus. *Electromyogr Clin*  
1651 *Neurophysiol*. 44:167–73.
- 1652 Parrell, B., Ramanarayanan, V., Nagarajan, S., & Houde, J. (2019). The FACTS model of speech motor  
1653 control: Fusing state estimation and task-based control. *PLoS Computational Biology*, 15(9), e1007321.  
1654 <http://doi.org/10.1371/journal.pcbi.1007321>
- 1655 Pelzer, E. A., Melzer, C., Timmermann, L., von Cramon, D. Y., & Tittgemeyer, M. (2017). Basal ganglia and  
1656 cerebellar interconnectivity within the human thalamus. *Brain structure & function*, 222(1), 381–392.  
1657 <https://doi.org/10.1007/s00429-016-1223-z>
- 1658 Pidoux, L., Le Blanc, P., Levenes, C., & Leblois, A. (2018). A subcortical circuit linking the cerebellum to the  
1659 basal ganglia engaged in vocal learning. *eLife*, 7, e32167. <https://doi.org/10.7554/eLife.32167>
- 1660 Pierre, J. S. (2015). Distending Straight-Masculine Time: A Phenomenology of the Disabled Speaking Body.  
1661 *Hypatia*, 30(1), 49–65. <http://doi.org/10.1111/hypa.12128>
- 1662 Poggio, T., & Koch, C. (1985). Ill-posed problems in early vision: From computational theory to analogue  
1663 networks. *Proceedings of the Royal Society of London - Biological Sciences*, 226(1244), 303–323.  
1664 <http://doi.org/10.1098/rspb.1985.0097>
- 1665 Poeppel, D., Idsardi, W. J., & van Wassenhove, V. (2008). Speech Perception at the Interface of  
1666 Neurobiology and Linguistics. *Philosophical Transactions: Biological Sciences*, 363(1493), 1071–1086.
- 1667 Pörschmann, C. (2000). Influences of bone conduction and air conduction on the sound of one's own  
1668 voice. *Acta Acustica United with Acustica*, 86(6), 1038–1045.
- 1669 Postma, A. (2000). Detection of errors during speech production: A review of speech monitoring models.  
1670 *Cognitive and Behavioral Neurology*, 77(2), 97–132. [http://doi.org/10.1016/S0010-0277\(00\)00090-1](http://doi.org/10.1016/S0010-0277(00)00090-1)
- 1671 Rayleigh (J.W. Strutt, 3rd Baron Rayleigh) (1907) On our perception of sound direction. The London,  
1672 Edinburgh, and Dublin Philosophical Magazine and Journal of Science, 13(74) XII: 214-232.
- 1673 Reinfeldt, S., Östli, P., Håkansson, B., & Stenfelt, S. (2010). Hearing one's own voice during phoneme  
1674 vocalization—Transmission by air and bone conduction. *The Journal of the Acoustical Society of*  
1675 *America*, 128(2), 751–762. <http://doi.org/10.1121/1.3458855>
- 1676 Reynolds, J. N., Hyland, B. I., & Wickens, J. R. (2001). A cellular mechanism of reward-related learning.  
1677 *Nature*, 413, 67–70.
- 1678 Rescorla, Michael (2019) "Convention", *The Stanford Encyclopedia of Philosophy* (Summer 2019 Edition),  
1679 Edward N. Zalta (ed.), <https://plato.stanford.edu/archives/sum2019/entries/convention/>.
- 1680 Richels C, Buhr A, Conture E, Ntourou K. (2010) Utterance complexity and stuttering on function words in  
1681 preschool-age children who stutter. *Journal of Fluency Disorders*;35:314–331.
- 1682 Rosa, C., Lassonde, M., Pinard, C., Keenan, J. P., & Belin, P. (2008). Investigations of hemispheric  
1683 specialization of self-voice recognition. *Brain and Cognition*, 68(2), 204–214.  
1684 <http://doi.org/10.1016/j.bandc.2008.04.007>
- 1685 Rosenfield D.B., Jerger J. (1984). Stuttering and auditory function. In: Curlee RF, Perkins WH, editors.  
1686 Nature and treatment of stuttering: New directions. San Diego: College-Hill Press. pp. 73–87.
- 1687 Rosengren, S. M., & Colebatch, J. G. (2018). The Contributions of Vestibular Evoked Myogenic Potentials  
1688 and Acoustic Vestibular Stimulation to Our Understanding of the Vestibular System. *Frontiers in*  
1689 *Neurology*, 9, 481. <http://doi.org/10.3389/fneur.2018.00481>
- 1690 Rousey, C. L., Goetzinger, C. P., & Dirks, D. (1959). Sound localization ability of normal, stuttering,  
1691 neurotic, and hemiplegic subjects. *A.M.a. Archives of General Psychiatry*, 1, 640–645.
- 1692 Ryugo, D.K., Fay, R.R. & Popper, A.N. (eds) (2011) Auditory and Vestibular Efferents. Springer Handbook  
1693 of Auditory Research, vol 38. Springer, New York, NY
- 1694 Sato, Y., Mori, K., Koizumi, T., Minagawa-Kawai, Y., Tanaka, A., Ozawa, E., et al. (2011). Functional  
1695 lateralization of speech processing in adults and children who stutter. *Frontiers in Psychology*, 2, 70.  
1696 <http://doi.org/10.3389/fpsyg.2011.00070>

- 1697 Schindwein, P., Mueller, M., Bauermann, T., Brandt, T., Stoeter, P., & Dieterich, M. (2008). Cortical  
1698 representation of saccular vestibular stimulation: VEMPs in fMRI. *NeuroImage*, 39(1), 19–31.  
1699 <http://doi.org/10.1016/j.neuroimage.2007.08.016>
- 1700 Schultz, W. (2016). Dopamine reward prediction-error signalling: a two-component response. *Nat Rev*  
1701 *Neurosci.* 2016 March ; 17(3): 183–195. doi:10.1038/nrn.2015.26.
- 1702 Seery C.H., Watkins R.V., Mangelsdorf S.C., Shigeto A. (2007). Subtyping stuttering II: contributions from  
1703 language and temperament. *J Fluency Disord.*;32(3):197–217. 10.1016/j.jfludis.2007.07.001 .
- 1704 Shahed, J., & Jankovic, J. (2001). Re-emergence of childhood stammering in Parkinson's disease: A  
1705 hypothesis. *Movement Disorders*, 16, 114–118.
- 1706 Shane, M. L. S. (1955) Effect on stuttering of alteration in auditory feedback. In *Stuttering in children and*  
1707 *adults*. University of Minnesota Press, Minneapolis.
- 1708 Sheehan, J.G. (1953) "Theory and treatment of stuttering as an approach-avoidance conflict", *Journal of*  
1709 *Psychology*, 36, 27–49.
- 1710 Sheehan, J.G., (1958) Conflict theory of stuttering. In Eisenson, J. (ed.), *Stuttering: A Symposium*. New  
1711 York: Harper and Row.
- 1712 Sheehan, J.G. (1970). *Stuttering: Research and therapy*. New York: Harper & Row.
- 1713 Sheehan, J.G. (1975). Conflict theory and avoidance reduction therapy. In J. Eisenson (Ed.), *Stuttering: A*  
1714 *second symposium* (pp. 97-198). New York: Harper & Row.
- 1715 Sheehan, J., Hadley, R. & Gould, E., (1967). "Impact of authority on stuttering" *Journal of Abnormal*  
1716 *Psychology*, 72, 290–293.
- 1717 Shuster, L. I., & Durrant, J. D. (2003). Toward a better understanding of the perception of self-produced  
1718 speech. *Journal of Communication Disorders*.
- 1719 Singer, C. M., Hessling, A., Kelly, E. M., Singer, L., & Jones, R. M. (2020). Clinical Characteristics Associated  
1720 With Stuttering Persistence: A Meta-Analysis. *Journal of Speech, Language, and Hearing Research*,  
1721 63(9), 2995–3018. [http://doi.org/10.1044/2020\\_JSLHR-20-00096](http://doi.org/10.1044/2020_JSLHR-20-00096)
- 1722 Skipper, J.I. & Lamettie, D.R. (2021) Speech Perception under the Tent: A Domain-general Predictive Role  
1723 for the Cerebellum. *Journal of Cognitive Neuroscience* 1–18. [https://doi.org/10.1162/jocn\\_a\\_01729](https://doi.org/10.1162/jocn_a_01729)
- 1724 Smith A., & Kelly E. (1997). Stuttering: A dynamic, multifactorial model. In Curlee R. & Siegel G. (Eds.),  
1725 *Nature and treatment of stuttering: New directions* (pp. 204–217). Boston, MA: Allyn & Bacon.
- 1726 Smith, A., & Weber, C. (2017). How Stuttering Develops: The Multifactorial Dynamic Pathways Theory.  
1727 *Journal of speech, language, and hearing research : JSLHR*, 60(9), 2483–2505.  
1728 [https://doi.org/10.1044/2017\\_JSLHR-S-16-0343](https://doi.org/10.1044/2017_JSLHR-S-16-0343)
- 1729 Smith, J., "Self-Consciousness" (2020). *The Stanford Encyclopedia of Philosophy* (Summer 2020 Edition),  
1730 Edward N. Zalta (ed.), URL = <[https://plato.stanford.edu/archives/sum2020/entries/self-](https://plato.stanford.edu/archives/sum2020/entries/self-consciousness/)  
1731 [consciousness/](https://plato.stanford.edu/archives/sum2020/entries/self-consciousness/)>.
- 1732 Smith, P. F. (2012). Interactions between the vestibular nucleus and the dorsal cochlear nucleus:  
1733 implications for tinnitus. *Hearing Research*, 292(1-2), 80–82.  
1734 <http://doi.org/10.1016/j.heares.2012.08.006>
- 1735 Sohmer, H., & Freeman, S. (2001). The latency of auditory nerve brainstem evoked responses to air-and  
1736 bone-conducted stimuli. *Hearing Research*.
- 1737 Sohmer, H. (2017). Soft Tissue Conduction: Review, Mechanisms, and Implications. *Trends in Hearing*, 21,  
1738 2331216517734087. <http://doi.org/10.1177/2331216517734087>
- 1739 Stager, S. V. (1990). Heterogeneity in stuttering. *Journal of Fluency Disorders*, 15(1), 9–19.  
1740 [http://doi.org/10.1016/0094-730X\(90\)90028-Q](http://doi.org/10.1016/0094-730X(90)90028-Q)
- 1741 Steinbeis, N. (2016). The role of self–other distinction in understanding others' mental and emotional  
1742 states: neurocognitive mechanisms in children and adults. *Phil. Trans. R. Soc. B*, 371:20150074  
1743 <http://doi.org/10.1098/rstb.2015.0074>
- 1744 Starkweather, C. W. & Gottwald, S. R., (1990). The demands and capacities model: II. Clinical applications.  
1745 *Journal of Fluency Disorders*, 15, 143–157.
- 1746 Starkweather, C. W. (2002). The epigenesis of stuttering. *Journal of Fluency Disorders*, 27(4), 269–87–  
1747 quiz 287–8. [http://doi.org/10.1016/s0094-730x\(02\)00144-4](http://doi.org/10.1016/s0094-730x(02)00144-4)
- 1748 Stevens, S.S. (1972) Perceived level of noise by mark VII and decibels (E). *J Acoust Soc Am* 51:575–601.
- 1749 Stromsta, C. (1972). Interaural phase disparity of stutterers and nonstutterers. *Journal of Speech and*  
1750 *Hearing Research*, 15(4), 771–780.

## Weak vestibular response in persistent developmental stuttering and implications for own voice identification

- 1751 Stuart, A., Kalinowski, J., Rastatter, M., Saltuklaroglu, T., & Dayalu, V. (2004). Investigations of the impact  
1752 of altered auditory feedback in-the-ear devices on the speech of people who stutter: initial fitting and  
1753 4-month follow-up. *International Journal of Language & Communication Disorders*, 39(1), 93–113.  
1754 <http://doi.org/10.1080/13682820310001616976>
- 1755 Suchodoletz, W., & Wolfram, I. (1996). Brainstem auditory evoked potentials (BAEP) in children with  
1756 developmental language disorders. *Klinische Pädiatrie*, 208(05), 290–293. [http://doi.org/10.1055/s-](http://doi.org/10.1055/s-2008-1046485)  
1757 [2008-1046485](http://doi.org/10.1055/s-2008-1046485)
- 1758 Sugathan, N., & Maruthy, S. (2020). Predictive factors for persistence and recovery of stuttering in  
1759 children: A systematic review. *International Journal of Speech-Language Pathology*, 1–13.  
1760 <http://doi.org/10.1080/17549507.2020.1812718>
- 1761 Suthers, R.A., Tecumseh Fitch, W., Fay, R.R. & Popper, A.N. (eds) (2016) Vertebrate Sound Production and  
1762 Acoustic Communication. Springer Handbook of Auditory Research, vol 53. Springer, New York, NY
- 1763 Tahaei, A. A., Ashayeri, H., Pourbakht, A., & Kamali, M. (2014). Speech evoked auditory brainstem  
1764 response in stuttering. *Scientifica*, 2014, 328646. <http://doi.org/10.1155/2014/328646>
- 1765 Theys, C., van Wieringen, A., Tuyls, L., & De Nil, L. (2009). Acquired stuttering in a 16-year-old boy.  
1766 *Journal of Neurolinguistics*, 22(5), 427–435. <http://doi.org/10.1016/j.jneuroling.2009.02.001>
- 1767 Tichenor, S., & Yaruss, J. S. (2018). A Phenomenological Analysis of the Experience of Stuttering.  
1768 *American Journal of Speech-Language Pathology*, 27(3S), 1180–1194.  
1769 [http://doi.org/10.1044/2018\\_AJSLP-ODC11-17-0192](http://doi.org/10.1044/2018_AJSLP-ODC11-17-0192)
- 1770 Tichenor, S., & Yaruss, J. S. (2019). Stuttering as Defined by Adults Who Stutter. *Journal of Speech,*  
1771 *Language and Hearing Research*, vol 62, 4356–4369. [http://doi.org/10.1044/2018\\_AJSLP-ODC11-17-](http://doi.org/10.1044/2018_AJSLP-ODC11-17-0192)  
1772 [0192](http://doi.org/10.1044/2018_AJSLP-ODC11-17-0192)
- 1773 Todd, N. P. M., Paillard, A. C., Kluk, K., Whittle, E., & Colebatch, J. G. (2014a). Vestibular receptors  
1774 contribute to cortical auditory evoked potentials. *Hearing Research*, 309, 63–74.  
1775 <http://doi.org/10.1016/j.heares.2013.11.008>
- 1776 Todd, N. P. M., Paillard, A. C., Kluk, K., Whittle, E., & Colebatch, J. G. (2014b). Source analysis of short and  
1777 long latency vestibular-evoked potentials (VsEPs) produced by left vs. right ear air-conducted 500 Hz  
1778 tone pips. *Hearing Research*, 312(C), 91–102. <http://doi.org/10.1016/j.heares.2014.03.006>
- 1779 Todd, N. P. M., Rosengren, S. M., & Colebatch, J. G. (2003). A short latency vestibular evoked potential  
1780 (VsEP) produced by bone-conducted acoustic stimulation. *Journal of the Acoustical Society of America*,  
1781 114(6 Pt 1), 3264–3272. <http://doi.org/10.1121/1.1628249>
- 1782 Todd, N.P.M., Rosengren, S.M., Colebatch, J.G., 2008. A source analysis of short- latency vestibular  
1783 evoked potentials produced by air- and bone-conducted sound. *Neurophysiol. Clin.* 119 (8),  
1784 1881e1894.
- 1785 Todd, N. P., & Lee, C. S. (2015). The sensory-motor theory of rhythm and beat induction 20 years on: a  
1786 new synthesis and future perspectives. *Frontiers in Human Neuroscience*, 9.  
1787 <http://doi.org/10.3389/fnhum.2015.00444>
- 1788 Toyomura A., Fujii T., Yokosawa K., & Kuriki S. (2018). Speech disfluency-dependent amygdala activity in  
1789 adults who stutter: Neuroimaging of interpersonal communication in MRI scanner  
1790 environment. *Neuroscience*, 374, 144–154.
- 1791 Toyomura, A., Koyama, S., Miyamaoto, T., Terao, A., Omori, T., Murohashi, H., & Kuriki, S. (2007). Neural  
1792 correlates of auditory feedback control in human. *Neuroscience*, 146(2), 499–503.  
1793 <https://doi.org/10.1016/j.neuroscience.2007.02.023>
- 1794 Traer, J., & McDermott, J. H. (2016). Statistics of natural reverberation enable perceptual separation of  
1795 sound and space. *Proceedings of the National Academy of Sciences*, 113(48), E7856–E7865.  
1796 <http://doi.org/10.1073/pnas.1612524113>
- 1797 Tye, M. (2018). "Qualia", *The Stanford Encyclopedia of Philosophy* (Summer 2018 Edition), Edward N.  
1798 Zalta (ed.), URL = <<https://plato.stanford.edu/archives/sum2018/entries/qualia/>>.
- 1799 Van Borsel, J. (2014). Acquired stuttering: A note on terminology. *Journal of Neurolinguistics*, 27(1), 41–  
1800 49. <http://doi.org/10.1016/j.jneuroling.2013.09.003>
- 1801 Van Riper, C. (1971), *The Nature of Stuttering*, 1st ed, Englewood Cliffs: Prentice-Hall.
- 1802 Van Riper, C. (1973), *The Treatment of Stuttering*, Englewood Cliffs: Prentice-Hall.

- 1803 Van Riper, C. (1982), *The Nature of Stuttering*, 2nd ed, Englewood Cliffs: Prentice-Hall.
- 1804 Walden, T. A., Frankel, C. B., Buhr, A. P., Johnson, K. N., Conture, E. G., & Karrass, J. M. (2012). Dual  
1805 diathesis-stressor model of emotional and linguistic contributions to developmental stuttering.  
1806 *Journal of abnormal child psychology*, 40(4), 633–644. <https://doi.org/10.1007/s10802-011-9581-8>
- 1807 Wallach, H., Newman, E. B., & Rosenzweig, M. R. (1949). "The precedence effect in sound localization,"  
1808 *The American Journal of Psychology*, 62, 315–336.
- 1809 Ward, D. (2010). Sudden onset stuttering in an adult: Neurogenic and psychogenic perspectives. *Journal*  
1810 *of Neurolinguistics*.
- 1811 Warren, R. (1973). Quantification of Loudness. *The American Journal of Psychology*, 86(4), 807-825.  
1812 doi:10.2307/1422087
- 1813 Waters, F. & Fernyhough, C. (2019). Auditory Hallucinations: Does a Continuum of Severity Entail  
1814 Continuity in Mechanism? *Schizophrenia Bulletin* 45(4): 717-719.
- 1815 Weintraub, D. M., Ramage, E. M., Sutton, G., Ringdahl, E., Boren, A., Pasinski, A. C., et al. (2012).  
1816 Auditory stream segregation impairments in schizophrenia. *Psychophysiology*, 49(10), 1372– 1383.  
1817 <http://doi.org/10.1111/j.1469-8986.2012.01457.x>
- 1818 Welgampola, M. S., Rosengren, S. M., Halmagyi, G. M., & Colebatch, J. G. (2003). Vestibular activation by  
1819 bone conducted sound. *Journal of Neurology, Neurosurgery & Psychiatry*, 74(6), 771–778.  
1820 <http://doi.org/10.1136/jnnp.74.6.771>
- 1821 Wingate, M. E. (1986a). Adaptation, consistency and beyond. I. Limitations and contradictions. *Journal of*  
1822 *Fluency Disorders*, 11(1), 1–36 [http://dx.doi.org/10.1016/0094-730X\(86\)90002-1](http://dx.doi.org/10.1016/0094-730X(86)90002-1).
- 1823 Wingate, M. E. (1986b). Adaptation, consistency and beyond. II. An integral account. *Journal of Fluency*  
1824 *Disorders*, 11(1), 37–53 [http://dx.doi.org/10.1016/0094-730X\(86\)90003-3](http://dx.doi.org/10.1016/0094-730X(86)90003-3).
- 1825 Wingate, M.E. (1969). Sound and pattern in "artificial" fluency. *Journal of Speech and Hearing Research*  
1826 12: 677–86.
- 1827 Wyneken, C. (1868). Über das Stottern und dessen Heilung. *Zeitschrift für rationelle Medizin*, 31, 1–29.
- 1828 Wu, J. C., Maguire, G., Riley, G., Lee, A., Keator, D., & Tang, C. (1997). Increased dopamine activity  
1829 associated with stuttering. *Clinical Neuroscience and Neuropsychology*, 8, 767–770.
- 1830 Yadav, M., Cabrera, D., & Martens, W. L. (2012). A system for simulating room acoustical environments  
1831 for one's own voice. *Applied Acoustics*, 73(4), 409–414.  
1832 <http://doi.org/10.1016/j.apacoust.2011.10.001>
- 1833 Yates, A. J. (1963). Recent Empirical and Theoretical Approaches to the Experimental Manipulation of  
1834 Speech in Normal Subjects and in Stammerers. *Behaviour Research and Therapy*, 1(2-4), 95–119.  
1835 [http://doi.org/10.1016/0005-7967\(63\)90013-5](http://doi.org/10.1016/0005-7967(63)90013-5)
- 1836 Yairi E. (2007) Subtyping Stuttering I: A Review. *Journal of Fluency Disorders*. 32(3):165-96. doi:  
1837 10.1016/j.jfludis.2007.04.001
- 1838 Yairi, E., & Ambrose, N. (2013). Epidemiology of stuttering: 21st century advances. *Journal of Fluency*  
1839 *Disorders*, 38(2), 66–87. <http://doi.org/10.1016/j.jfludis.2012.11.002>
- 1840 Yang, Y., Jia, F., Siok, W. T., & Tan, L. H. (2017). The role of anxiety in stuttering: Evidence from functional  
1841 connectivity. *Neuroscience*, 346, 216–225. <http://doi.org/10.1016/j.neuroscience.2016.11.033>
- 1842 Yates, A. J. (1963). Recent Empirical and Theoretical Approaches to the Experimental Manipulation of  
1843 Speech in Normal Subjects and in Stammerers. *Behaviour Research and Therapy*, 1(2-4), 95–119.  
1844 [http://doi.org/10.1016/0005-7967\(63\)90013-5](http://doi.org/10.1016/0005-7967(63)90013-5)
- 1845 Zarate, J. M., Wood, S., & Zatorre, R. J. (2010). Neural networks involved in voluntary and involuntary  
1846 vocal pitch regulation in experienced singers. *Neuropsychologia*, 48(2), 607–618. <https://doi.org/10.1016/j.neuropsychologia.2009.10.025>
- 1847 Zarate, J. M., & Zatorre, R. J. (2008). Experience-dependent neural substrates involved in vocal pitch  
1848 regulation during singing. *NeuroImage*, 40(4), 1871–1887. <https://doi.org/10.1016/j.neuroimage.2008.01.026>
- 1850 Zheng, Z. Z., Munhall, K. G., & Johnsrude, I. S. (2009). Functional overlap between regions involved in  
1851 speech perception and in monitoring one's own voice during speech production. *Journal of Cognitive*  
1852 *Neuroscience*, 22(8), 1770–1781. <https://doi.org/10.1162/jocn.2009.21324>
- 1853 Zwergal, A., Strupp, M., Brandt, T., & Büttner-Ennever, J. A. (2009). Parallel ascending vestibular  
1854 pathways: anatomical localization and functional specialization. *Annals of the New York Academy of*  
1855 *Sciences*, 1164(1), 51–59. <http://doi.org/10.1111/j.1749-6632.2009.04461.x>
- 1856

## Weak vestibular response in persistent developmental stuttering and implications for own voice identification

1857
